# Supplementary material for: Genetic alterations and functional networks of m6A RNA methylation regulators in pancreatic cancer based on data mining
Source: J Transl Med. 2021 Jul 30;19:323. doi: 10.1186/s12967-021-03001-2 (PMC8325265; doi:10.1186/s12967-021-03001-2)
Supplement: Supplementary file 9 — Additional file 9. Original data of exploring protein–protein interaction networks between m6A writers, erasers, and readers in humans (STRING). [file 12967_2021_3001_MOESM9_ESM.xlsx]

## Sheet: Biological Process
#term ID	term description	observed gene count	background gene count	false discovery rate	matching proteins in your network (IDs)	matching proteins in your network (labels)
GO:0050789	regulation of biological process	19	11116	0.0011	ENSP00000161863,ENSP00000258729,ENSP00000282007,ENSP00000290341,ENSP00000297591,ENSP00000298717,ENSP00000339245,ENSP00000346694,ENSP00000351141,ENSP00000358140,ENSP00000358799,ENSP00000359364,ENSP00000359645,ENSP00000362918,ENSP00000371634,ENSP00000373474,ENSP00000418823,ENSP00000454545,ENSP00000478490	EIF3A,FTO,HNRNPA2B1,IGF2BP1,IGF2BP2,IGF2BP3,KIAA1429,METTL14,METTL3,RBM15,RBM15B,RBMX,WTAP,YTHDC1,YTHDC2,YTHDF1,YTHDF2,YTHDF3,ZC3H13
GO:0050794	regulation of cellular process	18	10484	0.0028	ENSP00000161863,ENSP00000258729,ENSP00000290341,ENSP00000297591,ENSP00000298717,ENSP00000339245,ENSP00000346694,ENSP00000351141,ENSP00000358140,ENSP00000358799,ENSP00000359364,ENSP00000359645,ENSP00000362918,ENSP00000371634,ENSP00000373474,ENSP00000418823,ENSP00000454545,ENSP00000478490	EIF3A,FTO,HNRNPA2B1,IGF2BP1,IGF2BP2,IGF2BP3,KIAA1429,METTL14,METTL3,RBM15,RBM15B,RBMX,WTAP,YTHDC1,YTHDC2,YTHDF1,YTHDF2,YTHDF3
GO:0051171	regulation of nitrogen compound metabolic process	16	5827	5.52e-05	ENSP00000258729,ENSP00000290341,ENSP00000297591,ENSP00000298717,ENSP00000339245,ENSP00000346694,ENSP00000351141,ENSP00000358140,ENSP00000358799,ENSP00000359364,ENSP00000359645,ENSP00000362918,ENSP00000371634,ENSP00000373474,ENSP00000454545,ENSP00000478490	EIF3A,HNRNPA2B1,IGF2BP1,IGF2BP2,IGF2BP3,KIAA1429,METTL14,METTL3,RBM15,RBM15B,RBMX,WTAP,YTHDC1,YTHDF1,YTHDF2,YTHDF3
GO:0080090	regulation of primary metabolic process	16	5982	7.33e-05	ENSP00000258729,ENSP00000290341,ENSP00000297591,ENSP00000298717,ENSP00000339245,ENSP00000346694,ENSP00000351141,ENSP00000358140,ENSP00000358799,ENSP00000359364,ENSP00000359645,ENSP00000362918,ENSP00000371634,ENSP00000373474,ENSP00000454545,ENSP00000478490	EIF3A,HNRNPA2B1,IGF2BP1,IGF2BP2,IGF2BP3,KIAA1429,METTL14,METTL3,RBM15,RBM15B,RBMX,WTAP,YTHDC1,YTHDF1,YTHDF2,YTHDF3
GO:0060255	regulation of macromolecule metabolic process	16	6072	8.62e-05	ENSP00000258729,ENSP00000290341,ENSP00000297591,ENSP00000298717,ENSP00000339245,ENSP00000346694,ENSP00000351141,ENSP00000358140,ENSP00000358799,ENSP00000359364,ENSP00000359645,ENSP00000362918,ENSP00000371634,ENSP00000373474,ENSP00000454545,ENSP00000478490	EIF3A,HNRNPA2B1,IGF2BP1,IGF2BP2,IGF2BP3,KIAA1429,METTL14,METTL3,RBM15,RBM15B,RBMX,WTAP,YTHDC1,YTHDF1,YTHDF2,YTHDF3
GO:0031323	regulation of cellular metabolic process	16	6082	8.68e-05	ENSP00000258729,ENSP00000290341,ENSP00000297591,ENSP00000298717,ENSP00000339245,ENSP00000346694,ENSP00000351141,ENSP00000358140,ENSP00000358799,ENSP00000359364,ENSP00000359645,ENSP00000362918,ENSP00000371634,ENSP00000373474,ENSP00000454545,ENSP00000478490	EIF3A,HNRNPA2B1,IGF2BP1,IGF2BP2,IGF2BP3,KIAA1429,METTL14,METTL3,RBM15,RBM15B,RBMX,WTAP,YTHDC1,YTHDF1,YTHDF2,YTHDF3
GO:0010468	regulation of gene expression	15	4533	1.83e-05	ENSP00000258729,ENSP00000290341,ENSP00000297591,ENSP00000298717,ENSP00000339245,ENSP00000346694,ENSP00000351141,ENSP00000358799,ENSP00000359364,ENSP00000359645,ENSP00000362918,ENSP00000371634,ENSP00000373474,ENSP00000454545,ENSP00000478490	HNRNPA2B1,IGF2BP1,IGF2BP2,IGF2BP3,KIAA1429,METTL14,METTL3,RBM15,RBM15B,RBMX,WTAP,YTHDC1,YTHDF1,YTHDF2,YTHDF3
GO:0034641	cellular nitrogen compound metabolic process	15	5126	7.33e-05	ENSP00000161863,ENSP00000258729,ENSP00000282007,ENSP00000297591,ENSP00000298717,ENSP00000339245,ENSP00000346694,ENSP00000351141,ENSP00000358140,ENSP00000358799,ENSP00000359645,ENSP00000373474,ENSP00000382091,ENSP00000418823,ENSP00000454545	ALKBH5,EIF3A,FTO,HNRNPA2B1,IGF2BP3,KIAA1429,METTL14,METTL3,RBM15,RBM15B,RBMX,WTAP,YTHDC1,YTHDC2,ZC3H13
GO:0043170	macromolecule metabolic process	15	7453	0.0037	ENSP00000161863,ENSP00000258729,ENSP00000282007,ENSP00000297591,ENSP00000298717,ENSP00000339245,ENSP00000346694,ENSP00000351141,ENSP00000358140,ENSP00000358799,ENSP00000359645,ENSP00000373474,ENSP00000382091,ENSP00000418823,ENSP00000454545	ALKBH5,EIF3A,FTO,HNRNPA2B1,IGF2BP3,KIAA1429,METTL14,METTL3,RBM15,RBM15B,RBMX,WTAP,YTHDC1,YTHDC2,ZC3H13
GO:0044238	primary metabolic process	15	8808	0.0203	ENSP00000161863,ENSP00000258729,ENSP00000282007,ENSP00000297591,ENSP00000298717,ENSP00000339245,ENSP00000346694,ENSP00000351141,ENSP00000358140,ENSP00000358799,ENSP00000359645,ENSP00000373474,ENSP00000382091,ENSP00000418823,ENSP00000454545	ALKBH5,EIF3A,FTO,HNRNPA2B1,IGF2BP3,KIAA1429,METTL14,METTL3,RBM15,RBM15B,RBMX,WTAP,YTHDC1,YTHDC2,ZC3H13
GO:1903311	regulation of mRNA metabolic process	14	238	4.77e-20	ENSP00000258729,ENSP00000290341,ENSP00000297591,ENSP00000298717,ENSP00000339245,ENSP00000346694,ENSP00000351141,ENSP00000358799,ENSP00000359645,ENSP00000362918,ENSP00000371634,ENSP00000373474,ENSP00000454545,ENSP00000478490	HNRNPA2B1,IGF2BP1,IGF2BP2,IGF2BP3,KIAA1429,METTL14,METTL3,RBM15,RBM15B,RBMX,WTAP,YTHDC1,YTHDF2,YTHDF3
GO:0010467	gene expression	14	3733	1.4e-05	ENSP00000161863,ENSP00000258729,ENSP00000282007,ENSP00000297591,ENSP00000298717,ENSP00000339245,ENSP00000346694,ENSP00000351141,ENSP00000358140,ENSP00000358799,ENSP00000359645,ENSP00000373474,ENSP00000382091,ENSP00000454545	ALKBH5,EIF3A,HNRNPA2B1,IGF2BP3,KIAA1429,METTL14,METTL3,RBM15,RBM15B,RBMX,WTAP,YTHDC1,YTHDC2,ZC3H13
GO:0016070	RNA metabolic process	13	3430	4.26e-05	ENSP00000161863,ENSP00000282007,ENSP00000297591,ENSP00000298717,ENSP00000339245,ENSP00000346694,ENSP00000351141,ENSP00000358799,ENSP00000359645,ENSP00000373474,ENSP00000382091,ENSP00000418823,ENSP00000454545	ALKBH5,FTO,HNRNPA2B1,KIAA1429,METTL14,METTL3,RBM15,RBM15B,RBMX,WTAP,YTHDC1,YTHDC2,ZC3H13
GO:0032502	developmental process	13	5401	0.0024	ENSP00000161863,ENSP00000258729,ENSP00000282007,ENSP00000290341,ENSP00000297591,ENSP00000298717,ENSP00000351141,ENSP00000358799,ENSP00000362918,ENSP00000371634,ENSP00000373474,ENSP00000382091,ENSP00000418823	ALKBH5,FTO,IGF2BP1,IGF2BP2,IGF2BP3,KIAA1429,METTL14,METTL3,RBM15,WTAP,YTHDC2,YTHDF2,ZC3H13
GO:0006396	RNA processing	12	825	2.92e-10	ENSP00000161863,ENSP00000282007,ENSP00000297591,ENSP00000298717,ENSP00000339245,ENSP00000346694,ENSP00000351141,ENSP00000358799,ENSP00000359645,ENSP00000373474,ENSP00000382091,ENSP00000454545	ALKBH5,HNRNPA2B1,KIAA1429,METTL14,METTL3,RBM15,RBM15B,RBMX,WTAP,YTHDC1,YTHDC2,ZC3H13
GO:2000112	regulation of cellular macromolecule biosynthetic process	12	4050	0.00084	ENSP00000258729,ENSP00000290341,ENSP00000298717,ENSP00000346694,ENSP00000358799,ENSP00000359364,ENSP00000359645,ENSP00000362918,ENSP00000371634,ENSP00000373474,ENSP00000454545,ENSP00000478490	HNRNPA2B1,IGF2BP1,IGF2BP2,IGF2BP3,METTL14,METTL3,RBM15,RBM15B,RBMX,YTHDF1,YTHDF2,YTHDF3
GO:0048523	negative regulation of cellular process	12	4454	0.0019	ENSP00000161863,ENSP00000258729,ENSP00000290341,ENSP00000298717,ENSP00000346694,ENSP00000358140,ENSP00000358799,ENSP00000359645,ENSP00000362918,ENSP00000371634,ENSP00000373474,ENSP00000478490	EIF3A,HNRNPA2B1,IGF2BP1,IGF2BP2,IGF2BP3,METTL14,METTL3,RBM15,RBMX,YTHDC2,YTHDF2,YTHDF3
GO:0048856	anatomical structure development	12	5085	0.0052	ENSP00000161863,ENSP00000258729,ENSP00000282007,ENSP00000290341,ENSP00000297591,ENSP00000298717,ENSP00000351141,ENSP00000358799,ENSP00000362918,ENSP00000371634,ENSP00000373474,ENSP00000418823	FTO,IGF2BP1,IGF2BP2,IGF2BP3,KIAA1429,METTL14,METTL3,RBM15,WTAP,YTHDC2,YTHDF2,ZC3H13
GO:0044260	cellular macromolecule metabolic process	12	6413	0.0335	ENSP00000258729,ENSP00000282007,ENSP00000297591,ENSP00000298717,ENSP00000351141,ENSP00000358140,ENSP00000358799,ENSP00000359645,ENSP00000373474,ENSP00000382091,ENSP00000418823,ENSP00000454545	ALKBH5,EIF3A,FTO,IGF2BP3,KIAA1429,METTL14,METTL3,RBM15,RBM15B,RBMX,WTAP,ZC3H13
GO:0006397	mRNA processing	11	456	3.23e-11	ENSP00000282007,ENSP00000297591,ENSP00000298717,ENSP00000339245,ENSP00000346694,ENSP00000351141,ENSP00000358799,ENSP00000359645,ENSP00000373474,ENSP00000382091,ENSP00000454545	ALKBH5,HNRNPA2B1,KIAA1429,METTL14,METTL3,RBM15,RBM15B,RBMX,WTAP,YTHDC1,ZC3H13
GO:0008380	RNA splicing	10	391	1.98e-10	ENSP00000282007,ENSP00000297591,ENSP00000298717,ENSP00000339245,ENSP00000346694,ENSP00000351141,ENSP00000358799,ENSP00000359645,ENSP00000373474,ENSP00000454545	HNRNPA2B1,KIAA1429,METTL14,METTL3,RBM15,RBM15B,RBMX,WTAP,YTHDC1,ZC3H13
GO:0010608	posttranscriptional regulation of gene expression	10	441	4.53e-10	ENSP00000258729,ENSP00000290341,ENSP00000298717,ENSP00000339245,ENSP00000346694,ENSP00000359364,ENSP00000362918,ENSP00000371634,ENSP00000373474,ENSP00000478490	HNRNPA2B1,IGF2BP1,IGF2BP2,IGF2BP3,METTL14,METTL3,YTHDC1,YTHDF1,YTHDF2,YTHDF3
GO:0051172	negative regulation of nitrogen compound metabolic process	10	2307	0.00022	ENSP00000258729,ENSP00000290341,ENSP00000298717,ENSP00000346694,ENSP00000358140,ENSP00000359645,ENSP00000362918,ENSP00000371634,ENSP00000373474,ENSP00000478490	EIF3A,HNRNPA2B1,IGF2BP1,IGF2BP2,IGF2BP3,METTL14,METTL3,RBMX,YTHDF2,YTHDF3
GO:0031324	negative regulation of cellular metabolic process	10	2463	0.00037	ENSP00000258729,ENSP00000290341,ENSP00000298717,ENSP00000346694,ENSP00000358140,ENSP00000359645,ENSP00000362918,ENSP00000371634,ENSP00000373474,ENSP00000478490	EIF3A,HNRNPA2B1,IGF2BP1,IGF2BP2,IGF2BP3,METTL14,METTL3,RBMX,YTHDF2,YTHDF3
GO:0010605	negative regulation of macromolecule metabolic process	10	2558	0.00049	ENSP00000258729,ENSP00000290341,ENSP00000298717,ENSP00000346694,ENSP00000358140,ENSP00000359645,ENSP00000362918,ENSP00000371634,ENSP00000373474,ENSP00000478490	EIF3A,HNRNPA2B1,IGF2BP1,IGF2BP2,IGF2BP3,METTL14,METTL3,RBMX,YTHDF2,YTHDF3
GO:0009451	RNA modification	9	141	3.09e-12	ENSP00000282007,ENSP00000297591,ENSP00000298717,ENSP00000351141,ENSP00000358799,ENSP00000373474,ENSP00000382091,ENSP00000418823,ENSP00000454545	ALKBH5,FTO,KIAA1429,METTL14,METTL3,RBM15,RBM15B,WTAP,ZC3H13
GO:0010629	negative regulation of gene expression	9	1670	0.00013	ENSP00000258729,ENSP00000290341,ENSP00000298717,ENSP00000346694,ENSP00000359645,ENSP00000362918,ENSP00000371634,ENSP00000373474,ENSP00000478490	HNRNPA2B1,IGF2BP1,IGF2BP2,IGF2BP3,METTL14,METTL3,RBMX,YTHDF2,YTHDF3
GO:0032268	regulation of cellular protein metabolic process	9	2486	0.0019	ENSP00000258729,ENSP00000290341,ENSP00000298717,ENSP00000358140,ENSP00000359364,ENSP00000362918,ENSP00000371634,ENSP00000373474,ENSP00000478490	EIF3A,IGF2BP1,IGF2BP2,IGF2BP3,METTL14,METTL3,YTHDF1,YTHDF2,YTHDF3
GO:0010604	positive regulation of macromolecule metabolic process	9	3081	0.0068	ENSP00000290341,ENSP00000298717,ENSP00000346694,ENSP00000358799,ENSP00000359364,ENSP00000359645,ENSP00000362918,ENSP00000373474,ENSP00000478490	HNRNPA2B1,IGF2BP1,METTL14,METTL3,RBM15,RBMX,YTHDF1,YTHDF2,YTHDF3
GO:0065008	regulation of biological quality	9	3559	0.0171	ENSP00000258729,ENSP00000290341,ENSP00000298717,ENSP00000346694,ENSP00000362918,ENSP00000371634,ENSP00000373474,ENSP00000418823,ENSP00000478490	FTO,HNRNPA2B1,IGF2BP1,IGF2BP2,IGF2BP3,METTL14,METTL3,YTHDF2,YTHDF3
GO:0006417	regulation of translation	8	327	1.83e-08	ENSP00000258729,ENSP00000290341,ENSP00000298717,ENSP00000359364,ENSP00000362918,ENSP00000371634,ENSP00000373474,ENSP00000478490	IGF2BP1,IGF2BP2,IGF2BP3,METTL14,METTL3,YTHDF1,YTHDF2,YTHDF3
GO:0032269	negative regulation of cellular protein metabolic process	8	1014	4.64e-05	ENSP00000258729,ENSP00000290341,ENSP00000298717,ENSP00000358140,ENSP00000362918,ENSP00000371634,ENSP00000373474,ENSP00000478490	EIF3A,IGF2BP1,IGF2BP2,IGF2BP3,METTL14,METTL3,YTHDF2,YTHDF3
GO:2000113	negative regulation of cellular macromolecule biosynthetic process	8	1348	0.00022	ENSP00000258729,ENSP00000290341,ENSP00000298717,ENSP00000346694,ENSP00000362918,ENSP00000371634,ENSP00000373474,ENSP00000478490	HNRNPA2B1,IGF2BP1,IGF2BP2,IGF2BP3,METTL14,METTL3,YTHDF2,YTHDF3
GO:0051704	multi-organism process	8	2222	0.0041	ENSP00000161863,ENSP00000298717,ENSP00000358140,ENSP00000358799,ENSP00000362918,ENSP00000373474,ENSP00000382091,ENSP00000454545	ALKBH5,EIF3A,METTL14,METTL3,RBM15,RBM15B,YTHDC2,YTHDF2
GO:0051239	regulation of multicellular organismal process	8	2788	0.0141	ENSP00000258729,ENSP00000282007,ENSP00000290341,ENSP00000298717,ENSP00000358799,ENSP00000362918,ENSP00000371634,ENSP00000418823	FTO,IGF2BP1,IGF2BP2,IGF2BP3,METTL3,RBM15,YTHDF2,ZC3H13
GO:0051173	positive regulation of nitrogen compound metabolic process	8	2946	0.0193	ENSP00000298717,ENSP00000346694,ENSP00000358799,ENSP00000359364,ENSP00000359645,ENSP00000362918,ENSP00000373474,ENSP00000478490	HNRNPA2B1,METTL14,METTL3,RBM15,RBMX,YTHDF1,YTHDF2,YTHDF3
GO:0031325	positive regulation of cellular metabolic process	8	3060	0.0238	ENSP00000298717,ENSP00000346694,ENSP00000358799,ENSP00000359364,ENSP00000359645,ENSP00000362918,ENSP00000373474,ENSP00000478490	HNRNPA2B1,METTL14,METTL3,RBM15,RBMX,YTHDF1,YTHDF2,YTHDF3
GO:0001510	RNA methylation	7	69	1.03e-10	ENSP00000282007,ENSP00000297591,ENSP00000298717,ENSP00000351141,ENSP00000358799,ENSP00000373474,ENSP00000454545	KIAA1429,METTL14,METTL3,RBM15,RBM15B,WTAP,ZC3H13
GO:0043488	regulation of mRNA stability	7	113	1.1e-09	ENSP00000258729,ENSP00000290341,ENSP00000298717,ENSP00000362918,ENSP00000371634,ENSP00000373474,ENSP00000478490	IGF2BP1,IGF2BP2,IGF2BP3,METTL14,METTL3,YTHDF2,YTHDF3
GO:0050684	regulation of mRNA processing	7	114	1.1e-09	ENSP00000297591,ENSP00000339245,ENSP00000346694,ENSP00000351141,ENSP00000358799,ENSP00000359645,ENSP00000454545	HNRNPA2B1,KIAA1429,RBM15,RBM15B,RBMX,WTAP,YTHDC1
GO:0017148	negative regulation of translation	7	117	1.15e-09	ENSP00000258729,ENSP00000290341,ENSP00000298717,ENSP00000362918,ENSP00000371634,ENSP00000373474,ENSP00000478490	IGF2BP1,IGF2BP2,IGF2BP3,METTL14,METTL3,YTHDF2,YTHDF3
GO:0051028	mRNA transport	7	148	3.95e-09	ENSP00000258729,ENSP00000290341,ENSP00000339245,ENSP00000346694,ENSP00000371634,ENSP00000382091,ENSP00000454545	ALKBH5,HNRNPA2B1,IGF2BP1,IGF2BP2,IGF2BP3,RBM15B,YTHDC1
GO:0010557	positive regulation of macromolecule biosynthetic process	7	1758	0.0051	ENSP00000298717,ENSP00000346694,ENSP00000358799,ENSP00000359364,ENSP00000359645,ENSP00000362918,ENSP00000478490	HNRNPA2B1,METTL3,RBM15,RBMX,YTHDF1,YTHDF2,YTHDF3
GO:0045935	positive regulation of nucleobase-containing compound metabolic process	7	1770	0.0052	ENSP00000298717,ENSP00000346694,ENSP00000358799,ENSP00000359645,ENSP00000362918,ENSP00000373474,ENSP00000478490	HNRNPA2B1,METTL14,METTL3,RBM15,RBMX,YTHDF2,YTHDF3
GO:0010628	positive regulation of gene expression	7	1826	0.006	ENSP00000290341,ENSP00000298717,ENSP00000358799,ENSP00000359364,ENSP00000359645,ENSP00000362918,ENSP00000478490	IGF2BP1,METTL3,RBM15,RBMX,YTHDF1,YTHDF2,YTHDF3
GO:0031328	positive regulation of cellular biosynthetic process	7	1846	0.0063	ENSP00000298717,ENSP00000346694,ENSP00000358799,ENSP00000359364,ENSP00000359645,ENSP00000362918,ENSP00000478490	HNRNPA2B1,METTL3,RBM15,RBMX,YTHDF1,YTHDF2,YTHDF3
GO:0048024	regulation of mRNA splicing, via spliceosome	6	77	5.5e-09	ENSP00000339245,ENSP00000346694,ENSP00000351141,ENSP00000358799,ENSP00000359645,ENSP00000454545	HNRNPA2B1,RBM15,RBM15B,RBMX,WTAP,YTHDC1
GO:0000398	mRNA splicing, via spliceosome	6	284	4.89e-06	ENSP00000298717,ENSP00000339245,ENSP00000346694,ENSP00000358799,ENSP00000359645,ENSP00000373474	HNRNPA2B1,METTL14,METTL3,RBM15,RBMX,YTHDC1
GO:0022414	reproductive process	6	1350	0.0066	ENSP00000161863,ENSP00000298717,ENSP00000358799,ENSP00000362918,ENSP00000373474,ENSP00000382091	ALKBH5,METTL14,METTL3,RBM15,YTHDC2,YTHDF2
GO:0051254	positive regulation of RNA metabolic process	6	1596	0.0138	ENSP00000298717,ENSP00000358799,ENSP00000359645,ENSP00000362918,ENSP00000373474,ENSP00000478490	METTL14,METTL3,RBM15,RBMX,YTHDF2,YTHDF3
GO:0080009	mRNA methylation	5	14	5.17e-10	ENSP00000282007,ENSP00000297591,ENSP00000298717,ENSP00000351141,ENSP00000373474	KIAA1429,METTL14,METTL3,WTAP,ZC3H13
GO:1903313	positive regulation of mRNA metabolic process	5	66	1.49e-07	ENSP00000298717,ENSP00000359645,ENSP00000362918,ENSP00000373474,ENSP00000478490	METTL14,METTL3,RBMX,YTHDF2,YTHDF3
GO:0040029	regulation of gene expression, epigenetic	5	251	5.5e-05	ENSP00000298717,ENSP00000339245,ENSP00000346694,ENSP00000358799,ENSP00000454545	HNRNPA2B1,METTL3,RBM15,RBM15B,YTHDC1
GO:0007276	gamete generation	5	632	0.0019	ENSP00000161863,ENSP00000298717,ENSP00000362918,ENSP00000373474,ENSP00000382091	ALKBH5,METTL14,METTL3,YTHDC2,YTHDF2
GO:0009048	dosage compensation by inactivation of X chromosome	4	14	4.92e-08	ENSP00000298717,ENSP00000339245,ENSP00000358799,ENSP00000454545	METTL3,RBM15,RBM15B,YTHDC1
GO:0061157	mRNA destabilization	4	23	2.37e-07	ENSP00000298717,ENSP00000362918,ENSP00000373474,ENSP00000478490	METTL14,METTL3,YTHDF2,YTHDF3
GO:0045948	positive regulation of translational initiation	4	25	3.11e-07	ENSP00000298717,ENSP00000359364,ENSP00000362918,ENSP00000478490	METTL3,YTHDF1,YTHDF2,YTHDF3
GO:0000381	regulation of alternative mRNA splicing, via spliceosome	4	42	1.94e-06	ENSP00000351141,ENSP00000358799,ENSP00000359645,ENSP00000454545	RBM15,RBM15B,RBMX,WTAP
GO:0006406	mRNA export from nucleus	4	107	5.22e-05	ENSP00000339245,ENSP00000346694,ENSP00000382091,ENSP00000454545	ALKBH5,HNRNPA2B1,RBM15B,YTHDC1
GO:0007283	spermatogenesis	4	490	0.0053	ENSP00000161863,ENSP00000298717,ENSP00000373474,ENSP00000382091	ALKBH5,METTL14,METTL3,YTHDC2
GO:0044403	symbiont process	4	650	0.0129	ENSP00000161863,ENSP00000358140,ENSP00000358799,ENSP00000454545	EIF3A,RBM15,RBM15B,YTHDC2
GO:0051445	regulation of meiotic cell cycle	3	45	0.00012	ENSP00000161863,ENSP00000298717,ENSP00000362918	METTL3,YTHDC2,YTHDF2
GO:1903312	negative regulation of mRNA metabolic process	3	74	0.00042	ENSP00000290341,ENSP00000346694,ENSP00000359645	HNRNPA2B1,IGF2BP1,RBMX
GO:0042035	regulation of cytokine biosynthetic process	3	96	0.00079	ENSP00000258729,ENSP00000290341,ENSP00000371634	IGF2BP1,IGF2BP2,IGF2BP3
GO:0019827	stem cell population maintenance	3	118	0.0013	ENSP00000290341,ENSP00000298717,ENSP00000373474	IGF2BP1,METTL14,METTL3
GO:0022618	ribonucleoprotein complex assembly	3	203	0.0046	ENSP00000339245,ENSP00000358140,ENSP00000359645	EIF3A,RBMX,YTHDC1
GO:0030900	forebrain development	3	366	0.0189	ENSP00000290341,ENSP00000298717,ENSP00000373474	IGF2BP1,METTL14,METTL3
GO:1903706	regulation of hemopoiesis	3	412	0.0252	ENSP00000298717,ENSP00000358799,ENSP00000362918	METTL3,RBM15,YTHDF2
GO:0098508	endothelial to hematopoietic transition	2	2	6.29e-05	ENSP00000298717,ENSP00000362918	METTL3,YTHDF2
GO:0035553	oxidative single-stranded RNA demethylation	2	3	8.87e-05	ENSP00000382091,ENSP00000418823	ALKBH5,FTO
GO:1903679	positive regulation of cap-independent translational initiation	2	3	8.87e-05	ENSP00000298717,ENSP00000362918	METTL3,YTHDF2
GO:0021861	forebrain radial glial cell differentiation	2	7	0.00025	ENSP00000298717,ENSP00000373474	METTL14,METTL3
GO:0031053	primary miRNA processing	2	9	0.00037	ENSP00000298717,ENSP00000346694	HNRNPA2B1,METTL3
GO:0006307	DNA dealkylation involved in DNA repair	2	10	0.00042	ENSP00000382091,ENSP00000418823	ALKBH5,FTO
GO:0048025	negative regulation of mRNA splicing, via spliceosome	2	21	0.0013	ENSP00000346694,ENSP00000359645	HNRNPA2B1,RBMX
GO:1902036	regulation of hematopoietic stem cell differentiation	2	26	0.0019	ENSP00000298717,ENSP00000362918	METTL3,YTHDF2
GO:0006376	mRNA splice site selection	2	30	0.0023	ENSP00000339245,ENSP00000359645	RBMX,YTHDC1
GO:0048599	oocyte development	2	36	0.003	ENSP00000161863,ENSP00000362918	YTHDC2,YTHDF2
GO:0045746	negative regulation of Notch signaling pathway	2	37	0.0031	ENSP00000298717,ENSP00000362918	METTL3,YTHDF2
GO:0071359	cellular response to dsRNA	2	50	0.0051	ENSP00000298717,ENSP00000346694	HNRNPA2B1,METTL3
GO:0070555	response to interleukin-1	2	147	0.03	ENSP00000161863,ENSP00000359645	RBMX,YTHDC2

## Sheet: Cellular component
#term ID	term description	observed gene count	background gene count	false discovery rate	matching proteins in your network (IDs)	matching proteins in your network (labels)
GO:0044424	intracellular part	20	13996	0.0067	ENSP00000161863,ENSP00000258729,ENSP00000282007,ENSP00000290341,ENSP00000297591,ENSP00000298717,ENSP00000339245,ENSP00000346694,ENSP00000351141,ENSP00000358140,ENSP00000358799,ENSP00000359364,ENSP00000359645,ENSP00000362918,ENSP00000371634,ENSP00000373474,ENSP00000382091,ENSP00000418823,ENSP00000454545,ENSP00000478490	ALKBH5,EIF3A,FTO,HNRNPA2B1,IGF2BP1,IGF2BP2,IGF2BP3,KIAA1429,METTL14,METTL3,RBM15,RBM15B,RBMX,WTAP,YTHDC1,YTHDC2,YTHDF1,YTHDF2,YTHDF3,ZC3H13
GO:0043231	intracellular membrane-bounded organelle	18	10365	0.0031	ENSP00000161863,ENSP00000258729,ENSP00000282007,ENSP00000290341,ENSP00000297591,ENSP00000298717,ENSP00000339245,ENSP00000346694,ENSP00000351141,ENSP00000358140,ENSP00000358799,ENSP00000359645,ENSP00000362918,ENSP00000371634,ENSP00000373474,ENSP00000382091,ENSP00000418823,ENSP00000454545	ALKBH5,EIF3A,FTO,HNRNPA2B1,IGF2BP1,IGF2BP2,IGF2BP3,KIAA1429,METTL14,METTL3,RBM15,RBM15B,RBMX,WTAP,YTHDC1,YTHDC2,YTHDF2,ZC3H13
GO:0005634	nucleus	17	6892	6.68e-05	ENSP00000258729,ENSP00000282007,ENSP00000290341,ENSP00000297591,ENSP00000298717,ENSP00000339245,ENSP00000346694,ENSP00000351141,ENSP00000358140,ENSP00000358799,ENSP00000359645,ENSP00000362918,ENSP00000371634,ENSP00000373474,ENSP00000382091,ENSP00000418823,ENSP00000454545	ALKBH5,EIF3A,FTO,HNRNPA2B1,IGF2BP1,IGF2BP2,IGF2BP3,KIAA1429,METTL14,METTL3,RBM15,RBM15B,RBMX,WTAP,YTHDC1,YTHDF2,ZC3H13
GO:0044446	intracellular organelle part	15	8882	0.0275	ENSP00000282007,ENSP00000290341,ENSP00000297591,ENSP00000298717,ENSP00000339245,ENSP00000346694,ENSP00000351141,ENSP00000358140,ENSP00000358799,ENSP00000359645,ENSP00000362918,ENSP00000373474,ENSP00000382091,ENSP00000418823,ENSP00000454545	ALKBH5,EIF3A,FTO,HNRNPA2B1,IGF2BP1,KIAA1429,METTL14,METTL3,RBM15,RBM15B,RBMX,WTAP,YTHDC1,YTHDF2,ZC3H13
GO:0031981	nuclear lumen	14	4030	3.67e-05	ENSP00000282007,ENSP00000290341,ENSP00000297591,ENSP00000298717,ENSP00000339245,ENSP00000346694,ENSP00000351141,ENSP00000358140,ENSP00000358799,ENSP00000359645,ENSP00000373474,ENSP00000382091,ENSP00000418823,ENSP00000454545	ALKBH5,EIF3A,FTO,HNRNPA2B1,IGF2BP1,KIAA1429,METTL14,METTL3,RBM15,RBM15B,RBMX,WTAP,YTHDC1,ZC3H13
GO:0005654	nucleoplasm	13	3446	4.27e-05	ENSP00000282007,ENSP00000290341,ENSP00000297591,ENSP00000298717,ENSP00000339245,ENSP00000346694,ENSP00000351141,ENSP00000358799,ENSP00000359645,ENSP00000373474,ENSP00000382091,ENSP00000418823,ENSP00000454545	ALKBH5,FTO,HNRNPA2B1,IGF2BP1,KIAA1429,METTL14,METTL3,RBM15,RBM15B,RBMX,WTAP,YTHDC1,ZC3H13
GO:0032991	protein-containing complex	13	4792	0.00094	ENSP00000161863,ENSP00000282007,ENSP00000290341,ENSP00000297591,ENSP00000298717,ENSP00000346694,ENSP00000351141,ENSP00000358140,ENSP00000358799,ENSP00000359645,ENSP00000362918,ENSP00000373474,ENSP00000454545	EIF3A,HNRNPA2B1,IGF2BP1,KIAA1429,METTL14,METTL3,RBM15,RBM15B,RBMX,WTAP,YTHDC2,YTHDF2,ZC3H13
GO:0016604	nuclear body	10	742	1.85e-08	ENSP00000282007,ENSP00000297591,ENSP00000298717,ENSP00000339245,ENSP00000346694,ENSP00000351141,ENSP00000358799,ENSP00000382091,ENSP00000418823,ENSP00000454545	ALKBH5,FTO,HNRNPA2B1,KIAA1429,METTL3,RBM15,RBM15B,WTAP,YTHDC1,ZC3H13
GO:0016607	nuclear speck	9	381	1.68e-09	ENSP00000282007,ENSP00000297591,ENSP00000298717,ENSP00000339245,ENSP00000351141,ENSP00000358799,ENSP00000382091,ENSP00000418823,ENSP00000454545	ALKBH5,FTO,KIAA1429,METTL3,RBM15,RBM15B,WTAP,YTHDC1,ZC3H13
GO:1902494	catalytic complex	9	1295	3.31e-05	ENSP00000282007,ENSP00000297591,ENSP00000298717,ENSP00000346694,ENSP00000351141,ENSP00000358799,ENSP00000359645,ENSP00000373474,ENSP00000454545	HNRNPA2B1,KIAA1429,METTL14,METTL3,RBM15,RBM15B,RBMX,WTAP,ZC3H13
GO:0036396	RNA N6-methyladenosine methyltransferase complex	7	8	2.45e-16	ENSP00000282007,ENSP00000297591,ENSP00000298717,ENSP00000351141,ENSP00000358799,ENSP00000373474,ENSP00000454545	KIAA1429,METTL14,METTL3,RBM15,RBM15B,WTAP,ZC3H13
GO:1990904	ribonucleoprotein complex	6	770	0.00062	ENSP00000161863,ENSP00000290341,ENSP00000346694,ENSP00000358140,ENSP00000359645,ENSP00000362918	EIF3A,HNRNPA2B1,IGF2BP1,RBMX,YTHDC2,YTHDF2
GO:0035770	ribonucleoprotein granule	3	204	0.0066	ENSP00000161863,ENSP00000290341,ENSP00000362918	IGF2BP1,YTHDC2,YTHDF2
GO:0005635	nuclear envelope	3	446	0.0356	ENSP00000351141,ENSP00000358799,ENSP00000454545	RBM15,RBM15B,WTAP
GO:0070062	extracellular exosome	2	80	0.0147	ENSP00000346694,ENSP00000359645	HNRNPA2B1,RBMX
GO:0071013	catalytic step 2 spliceosome	2	99	0.0196	ENSP00000346694,ENSP00000359645	HNRNPA2B1,RBMX

## Sheet: Molecule  function
#term ID	term description	observed gene count	background gene count	false discovery rate	matching proteins in your network (IDs)	matching proteins in your network (labels)
GO:0005488	binding	18	11878	0.0242	ENSP00000161863,ENSP00000258729,ENSP00000282007,ENSP00000290341,ENSP00000298717,ENSP00000339245,ENSP00000346694,ENSP00000358140,ENSP00000358799,ENSP00000359364,ENSP00000359645,ENSP00000362918,ENSP00000371634,ENSP00000373474,ENSP00000382091,ENSP00000418823,ENSP00000454545,ENSP00000478490	ALKBH5,EIF3A,FTO,HNRNPA2B1,IGF2BP1,IGF2BP2,IGF2BP3,METTL14,METTL3,RBM15,RBM15B,RBMX,YTHDC1,YTHDC2,YTHDF1,YTHDF2,YTHDF3,ZC3H13
GO:0003723	RNA binding	15	850	5.63e-15	ENSP00000161863,ENSP00000258729,ENSP00000290341,ENSP00000298717,ENSP00000339245,ENSP00000346694,ENSP00000358140,ENSP00000358799,ENSP00000359364,ENSP00000359645,ENSP00000362918,ENSP00000371634,ENSP00000373474,ENSP00000454545,ENSP00000478490	EIF3A,HNRNPA2B1,IGF2BP1,IGF2BP2,IGF2BP3,METTL14,METTL3,RBM15,RBM15B,RBMX,YTHDC1,YTHDC2,YTHDF1,YTHDF2,YTHDF3
GO:0003729	mRNA binding	9	198	7.42e-12	ENSP00000258729,ENSP00000290341,ENSP00000298717,ENSP00000346694,ENSP00000358140,ENSP00000358799,ENSP00000359645,ENSP00000371634,ENSP00000373474	EIF3A,HNRNPA2B1,IGF2BP1,IGF2BP2,IGF2BP3,METTL14,METTL3,RBM15,RBMX
GO:1990247	N6-methyladenosine-containing RNA binding	6	7	4.48e-14	ENSP00000161863,ENSP00000339245,ENSP00000346694,ENSP00000359364,ENSP00000362918,ENSP00000478490	HNRNPA2B1,YTHDC1,YTHDC2,YTHDF1,YTHDF2,YTHDF3
GO:0140098	catalytic activity, acting on RNA	5	345	0.00019	ENSP00000161863,ENSP00000298717,ENSP00000373474,ENSP00000382091,ENSP00000418823	ALKBH5,FTO,METTL14,METTL3,YTHDC2
GO:0003730	mRNA 3'-UTR binding	4	63	1.23e-05	ENSP00000258729,ENSP00000290341,ENSP00000346694,ENSP00000371634	HNRNPA2B1,IGF2BP1,IGF2BP2,IGF2BP3
GO:0045182	translation regulator activity	4	124	0.00012	ENSP00000258729,ENSP00000290341,ENSP00000358140,ENSP00000371634	EIF3A,IGF2BP1,IGF2BP2,IGF2BP3
GO:0048027	mRNA 5'-UTR binding	3	24	4.63e-05	ENSP00000258729,ENSP00000290341,ENSP00000371634	IGF2BP1,IGF2BP2,IGF2BP3
GO:0016422	mRNA (2'-O-methyladenosine-N6-)-methyltransferase activity	2	3	0.00013	ENSP00000298717,ENSP00000373474	METTL14,METTL3
GO:0035515	oxidative RNA demethylase activity	2	4	0.00015	ENSP00000382091,ENSP00000418823	ALKBH5,FTO
GO:0016706	2-oxoglutarate-dependent dioxygenase activity	2	44	0.0071	ENSP00000382091,ENSP00000418823	ALKBH5,FTO
GO:0043022	ribosome binding	2	50	0.0084	ENSP00000359364,ENSP00000478490	YTHDF1,YTHDF3

## Sheet: Reactome Pathways
#term ID	term description	observed gene count	background gene count	false discovery rate	matching proteins in your network (IDs)	matching proteins in your network (labels)
HSA-8953854	Metabolism of RNA	8	652	1.96e-06	ENSP00000258729,ENSP00000290341,ENSP00000298717,ENSP00000346694,ENSP00000351141,ENSP00000359645,ENSP00000371634,ENSP00000373474	HNRNPA2B1,IGF2BP1,IGF2BP2,IGF2BP3,METTL14,METTL3,RBMX,WTAP
HSA-72203	Processing of Capped Intron-Containing Pre-mRNA	5	234	3.23e-05	ENSP00000298717,ENSP00000346694,ENSP00000351141,ENSP00000359645,ENSP00000373474	HNRNPA2B1,METTL14,METTL3,RBMX,WTAP
HSA-428359	Insulin-like Growth Factor-2 mRNA Binding Proteins (IGF2BPs/IMPs/VICKZs) bind RNA	3	3	5.09e-07	ENSP00000258729,ENSP00000290341,ENSP00000371634	IGF2BP1,IGF2BP2,IGF2BP3
HSA-73943	Reversal of alkylation damage by DNA dioxygenases	2	7	0.00025	ENSP00000382091,ENSP00000418823	ALKBH5,FTO
