# Supplementary material for: Genetic alterations and functional networks of m6A RNA methylation regulators in pancreatic cancer based on data mining
Source: J Transl Med. 2021 Jul 30;19:323. doi: 10.1186/s12967-021-03001-2 (PMC8325265; doi:10.1186/s12967-021-03001-2)
Supplement: Supplementary file 11 — Additional file 11. GO and KEGG pathways enrichment analysis of genes positively correlated with 20 main m6A regulators in pancreatic cancer (LinkedOmics). [file 12967_2021_3001_MOESM11_ESM.xlsx]

## Sheet: Biological process
GO_ID	GO_Term	GO_function	GO_class	S.gene.number	TS.gene.number	B.gene.number	TB.gene.number	pvalue
GO:0010467	gene expression	biological_process	5	337	713	5306	16650	1.12343e-18
GO:0034645	cellular macromolecule biosynthetic process	biological_process	3	317	713	5012	16650	1.8022e-16
GO:0016070	RNA metabolic process	biological_process	5	310	713	4648	16650	5.93399e-20
GO:0051171	regulation of nitrogen compound metabolic process	biological_process	6	291	713	4404	16650	9.10217e-18
GO:0010468	regulation of gene expression	biological_process	3	282	713	4345	16650	1.08932e-15
GO:0018130	heterocycle biosynthetic process	biological_process	7	276	713	4411	16650	3.3792e-13
GO:0019438	aromatic compound biosynthetic process	biological_process	5	276	713	4424	16650	4.88526e-13
GO:0034654	nucleobase-containing compound biosynthetic process	biological_process	5	274	713	4357	16650	2.36472e-13
GO:0019219	regulation of nucleobase-containing compound metabolic process	biological_process	13	269	713	4104	16650	2.5562e-15
GO:0010556	regulation of macromolecule biosynthetic process	biological_process	5	269	713	4107	16650	2.78838e-15
GO:2000112	regulation of cellular macromolecule biosynthetic process	biological_process	7	264	713	3991	16650	1.7527e-15
GO:0032774	RNA biosynthetic process	biological_process	8	251	713	3905	16650	4.69182e-13
GO:0051252	regulation of RNA metabolic process	biological_process	6	240	713	3762	16650	5.0367e-12
GO:0097659	nucleic acid-templated transcription	biological_process	9	240	713	3771	16650	6.50862e-12
GO:0006351	transcription, DNA-templated	biological_process	7	233	713	3605	16650	3.25124e-12
GO:1903506	regulation of nucleic acid-templated transcription	biological_process	7	227	713	3625	16650	1.80089e-10
GO:2001141	regulation of RNA biosynthetic process	biological_process	11	227	713	3644	16650	2.97709e-10
GO:0006355	regulation of transcription, DNA-templated	biological_process	5	225	713	3603	16650	2.93442e-10
GO:0036211	protein modification process	biological_process	8	218	713	3818	16650	1.25329e-06
GO:0006464	cellular protein modification process	biological_process	NA	218	713	3818	16650	1.25329e-06
GO:0009893	positive regulation of metabolic process	biological_process	8	166	713	3052	16650	0.000522084
GO:0010604	positive regulation of macromolecule metabolic process	biological_process	7	162	713	2856	16650	8.12727e-05
GO:0044085	cellular component biogenesis	biological_process	8	159	713	2914	16650	0.000640664
GO:0033036	macromolecule localization	biological_process	8	157	713	2817	16650	0.0002573
GO:0031325	positive regulation of cellular metabolic process	biological_process	8	157	713	2839	16650	0.000376737
GO:0009892	negative regulation of metabolic process	biological_process	6	155	713	2522	16650	1.58048e-06
GO:0051641	cellular localization	biological_process	7	152	713	2541	16650	9.40458e-06
GO:0007049	cell cycle	biological_process	6	149	713	1672	16650	1.21124e-18
GO:0010605	negative regulation of macromolecule metabolic process	biological_process	5	148	713	2326	16650	3.98684e-07
GO:0031324	negative regulation of cellular metabolic process	biological_process	7	144	713	2345	16650	4.54129e-06
GO:0043933	macromolecular complex subunit organization	biological_process	6	144	713	2461	16650	5.3853e-05
GO:0022607	cellular component assembly	biological_process	8	142	713	2618	16650	0.00170251
GO:0008104	protein localization	biological_process	10	133	713	2448	16650	0.00238349
GO:0051246	regulation of protein metabolic process	biological_process	4	132	713	2512	16650	0.00785921
GO:0051276	chromosome organization	biological_process	7	127	713	1184	16650	2.09658e-22
GO:0033554	cellular response to stress	biological_process	8	127	713	1773	16650	4.94242e-09
GO:0022402	cell cycle process	biological_process	7	123	713	1357	16650	1.18059e-15
GO:0032268	regulation of cellular protein metabolic process	biological_process	9	120	713	2346	16650	0.0246786
GO:0051128	regulation of cellular component organization	biological_process	8	118	713	2323	16650	0.0300296
GO:0051649	establishment of localization in cell	biological_process	7	114	713	2004	16650	0.00116687
GO:0006366	transcription from RNA polymerase II promoter	biological_process	10	111	713	1820	16650	0.000101547
GO:1902589	single-organism organelle organization	biological_process	8	110	713	1612	16650	7.71807e-07
GO:0045184	establishment of protein localization	biological_process	3	110	713	2021	16650	0.0058962
GO:0051173	positive regulation of nitrogen compound metabolic process	biological_process	9	109	713	1767	16650	7.65518e-05
GO:0051172	negative regulation of nitrogen compound metabolic process	biological_process	7	108	713	1506	16650	8.85878e-08
GO:0031328	positive regulation of cellular biosynthetic process	biological_process	8	105	713	1729	16650	0.000192114
GO:0009891	positive regulation of biosynthetic process	biological_process	6	105	713	1760	16650	0.000378065
GO:0010628	positive regulation of gene expression	biological_process	9	103	713	1692	16650	0.000206602
GO:0006357	regulation of transcription from RNA polymerase II promoter	biological_process	6	103	713	1835	16650	0.00316409
GO:0010557	positive regulation of macromolecule biosynthetic process	biological_process	6	102	713	1597	16650	3.64567e-05
GO:0010629	negative regulation of gene expression	biological_process	7	101	713	1485	16650	2.89852e-06
GO:0009890	negative regulation of biosynthetic process	biological_process	5	101	713	1504	16650	5.00493e-06
GO:0000278	mitotic cell cycle	biological_process	6	99	713	968	16650	7.02915e-16
GO:0045935	positive regulation of nucleobase-containing compound metabolic process	biological_process	6	99	713	1658	16650	0.000543714
GO:0044093	positive regulation of molecular function	biological_process	4	99	713	1840	16650	0.0125581
GO:0010558	negative regulation of macromolecule biosynthetic process	biological_process	6	98	713	1418	16650	2.08704e-06
GO:0031327	negative regulation of cellular biosynthetic process	biological_process	5	98	713	1480	16650	1.2999e-05
GO:0008283	cell proliferation	biological_process	7	98	713	1861	16650	0.0218628
GO:0046907	intracellular transport	biological_process	9	97	713	1594	16650	0.000342879
GO:0034613	cellular protein localization	biological_process	8	97	713	1600	16650	0.000385895
GO:0070727	cellular macromolecule localization	biological_process	10	97	713	1613	16650	0.000510966
GO:0045934	negative regulation of nucleobase-containing compound metabolic process	biological_process	6	95	713	1371	16650	2.82474e-06
GO:1903047	mitotic cell cycle process	biological_process	8	94	713	890	16650	6.33127e-16
GO:0012501	programmed cell death	biological_process	5	94	713	1852	16650	0.0549663
GO:2000113	negative regulation of cellular macromolecule biosynthetic process	biological_process	5	93	713	1324	16650	2.13697e-06
GO:0065003	macromolecular complex assembly	biological_process	9	93	713	1710	16650	0.0117337
GO:0015031	protein transport	biological_process	8	93	713	1860	16650	0.0730269
GO:0006259	DNA metabolic process	biological_process	6	92	713	995	16650	3.41565e-12
GO:0006508	proteolysis	biological_process	6	87	713	1693	16650	0.0517018
GO:0006915	apoptotic process	biological_process	5	87	713	1747	16650	0.0905298
GO:0051726	regulation of cell cycle	biological_process	13	85	713	976	16650	5.46542e-10
GO:0070647	protein modification by small protein conjugation or removal	biological_process	9	84	713	1032	16650	1.64091e-08
GO:0051254	positive regulation of RNA metabolic process	biological_process	10	83	713	1415	16650	0.00271467
GO:1902680	positive regulation of RNA biosynthetic process	biological_process	7	82	713	1369	16650	0.00168333
GO:0043085	positive regulation of catalytic activity	biological_process	7	82	713	1559	16650	0.0368781
GO:0044248	cellular catabolic process	biological_process	8	82	713	1616	16650	0.0740798
GO:0051253	negative regulation of RNA metabolic process	biological_process	8	81	713	1240	16650	0.000136165
GO:0009057	macromolecule catabolic process	biological_process	9	80	713	1201	16650	7.88739e-05
GO:1903508	positive regulation of nucleic acid-templated transcription	biological_process	10	80	713	1349	16650	0.00249103
GO:0045893	positive regulation of transcription, DNA-templated	biological_process	5	80	713	1349	16650	0.00249103
GO:0006396	RNA processing	biological_process	10	79	713	910	16650	2.89047e-09
GO:0018193	peptidyl-amino acid modification	biological_process	8	78	713	1185	16650	0.000145536
GO:0033043	regulation of organelle organization	biological_process	6	77	713	1152	16650	9.82787e-05
GO:1902679	negative regulation of RNA biosynthetic process	biological_process	7	76	713	1194	16650	0.000473389
GO:1903507	negative regulation of nucleic acid-templated transcription	biological_process	7	75	713	1177	16650	0.00051318
GO:0006974	cellular response to DNA damage stimulus	biological_process	7	74	713	807	16650	9.6203e-10
GO:0045892	negative regulation of transcription, DNA-templated	biological_process	11	74	713	1130	16650	0.000251232
GO:0044419	interspecies interaction between organisms	biological_process	8	73	713	998	16650	8.67159e-06
GO:0044403	symbiosis, encompassing mutualism through parasitism	biological_process	8	73	713	998	16650	8.67159e-06
GO:0044265	cellular macromolecule catabolic process	biological_process	9	72	713	976	16650	7.53973e-06
GO:0016032	viral process	biological_process	7	71	713	966	16650	9.78366e-06
GO:0044764	multi-organism cellular process	biological_process	13	71	713	973	16650	1.25161e-05
GO:0032446	protein modification by small protein conjugation	biological_process	8	69	713	887	16650	1.96734e-06
GO:0006325	chromatin organization	biological_process	8	68	713	768	16650	2.06647e-08
GO:0080134	regulation of response to stress	biological_process	7	68	713	1285	16650	0.0504332
GO:0048285	organelle fission	biological_process	6	65	713	622	16650	6.00555e-11
GO:0016071	mRNA metabolic process	biological_process	9	65	713	672	16650	1.45745e-09
GO:0044702	single organism reproductive process	biological_process	5	65	713	1231	16650	0.0579956
GO:0000280	nuclear division	biological_process	10	64	713	583	16650	1.07174e-11
GO:1902580	single-organism cellular localization	biological_process	6	64	713	1102	16650	0.0109868
GO:0051301	cell division	biological_process	9	62	713	575	16650	4.97141e-11
GO:0051248	negative regulation of protein metabolic process	biological_process	4	61	713	1049	16650	0.0132547
GO:0030163	protein catabolic process	biological_process	7	60	713	811	16650	4.54211e-05
GO:0009790	embryo development	biological_process	9	60	713	954	16650	0.002732
GO:0034622	cellular macromolecular complex assembly	biological_process	11	60	713	1004	16650	0.00803702
GO:0007010	cytoskeleton organization	biological_process	8	59	713	1144	16650	0.098346
GO:0006281	DNA repair	biological_process	12	58	713	530	16650	1.31332e-10
GO:0033365	protein localization to organelle	biological_process	7	58	713	902	16650	0.00203497
GO:0006886	intracellular protein transport	biological_process	9	58	713	1020	16650	0.0228123
GO:0045944	positive regulation of transcription from RNA polymerase II promoter	biological_process	6	58	713	1041	16650	0.0312816
GO:0016567	protein ubiquitination	biological_process	8	57	713	770	16650	7.0582e-05
GO:0061024	membrane organization	biological_process	8	57	713	1027	16650	0.0373993
GO:0006397	mRNA processing	biological_process	9	56	713	471	16650	1.19854e-11
GO:0016569	covalent chromatin modification	biological_process	7	56	713	550	16650	4.01016e-09
GO:0010564	regulation of cell cycle process	biological_process	7	56	713	595	16650	6.01115e-08
GO:0032269	negative regulation of cellular protein metabolic process	biological_process	6	55	713	992	16650	0.0391786
GO:0007067	mitotic nuclear division	biological_process	7	54	713	431	16650	3.88246e-12
GO:0051603	proteolysis involved in cellular protein catabolic process	biological_process	8	54	713	657	16650	6.8231e-06
GO:0044257	cellular protein catabolic process	biological_process	9	54	713	689	16650	2.58452e-05
GO:0032880	regulation of protein localization	biological_process	11	53	713	962	16650	0.0472108
GO:0006511	ubiquitin-dependent protein catabolic process	biological_process	8	52	713	577	16650	7.38119e-07
GO:0019941	modification-dependent protein catabolic process	biological_process	5	52	713	585	16650	1.1033e-06
GO:0043632	modification-dependent macromolecule catabolic process	biological_process	4	52	713	593	16650	1.65377e-06
GO:0051338	regulation of transferase activity	biological_process	10	52	713	955	16650	0.0579348
GO:0008380	RNA splicing	biological_process	6	49	713	400	16650	9.868e-11
GO:0044802	single-organism membrane organization	biological_process	10	49	713	866	16650	0.0398301
GO:0007059	chromosome segregation	biological_process	15	48	713	334	16650	5.34024e-13
GO:0007346	regulation of mitotic cell cycle	biological_process	9	48	713	491	16650	2.08007e-07
GO:0044770	cell cycle phase transition	biological_process	10	48	713	547	16650	4.37542e-06
GO:0000122	negative regulation of transcription from RNA polymerase II promoter	biological_process	5	47	713	748	16650	0.0084599
GO:0044772	mitotic cell cycle phase transition	biological_process	4	46	713	514	16650	4.28997e-06
GO:0070201	regulation of establishment of protein localization	biological_process	14	46	713	820	16650	0.0503411
GO:0016570	histone modification	biological_process	9	45	713	440	16650	1.50409e-07
GO:0060341	regulation of cellular localization	biological_process	8	45	713	834	16650	0.0883376
GO:0010256	endomembrane system organization	biological_process	8	44	713	559	16650	0.000147179
GO:0018205	peptidyl-lysine modification	biological_process	7	43	713	407	16650	1.22302e-07
GO:0010608	posttranscriptional regulation of gene expression	biological_process	10	43	713	472	16650	6.00582e-06
GO:0051169	nuclear transport	biological_process	6	43	713	473	16650	6.3424e-06
GO:0080135	regulation of cellular response to stress	biological_process	NA	43	713	581	16650	0.000639195
GO:0098813	nuclear chromosome segregation	biological_process	11	42	713	287	16650	1.0368e-11
GO:0051052	regulation of DNA metabolic process	biological_process	7	42	713	370	16650	2.40114e-08
GO:0006913	nucleocytoplasmic transport	biological_process	6	42	713	465	16650	9.68914e-06
GO:0045786	negative regulation of cell cycle	biological_process	8	42	713	470	16650	1.25069e-05
GO:0043009	chordate embryonic development	biological_process	6	42	713	577	16650	0.00103432
GO:0009792	embryo development ending in birth or egg hatching	biological_process	11	42	713	583	16650	0.00125801
GO:0070925	organelle assembly	biological_process	6	41	713	653	16650	0.0144865
GO:0072594	establishment of protein localization to organelle	biological_process	4	41	713	666	16650	0.0191932
GO:0007017	microtubule-based process	biological_process	8	40	713	618	16650	0.00994968
GO:0000819	sister chromatid segregation	biological_process	6	38	713	224	16650	1.31857e-12
GO:0000398	mRNA splicing, via spliceosome	biological_process	8	38	713	299	16650	6.28293e-09
GO:0000377	RNA splicing, via transesterification reactions with bulged adenosine as nucleophile	biological_process	6	38	713	299	16650	6.28293e-09
GO:0000375	RNA splicing, via transesterification reactions	biological_process	8	38	713	303	16650	8.9827e-09
GO:0051129	negative regulation of cellular component organization	biological_process	11	38	713	624	16650	0.0282171
GO:0051347	positive regulation of transferase activity	biological_process	7	38	713	640	16650	0.0388401
GO:0022613	ribonucleoprotein complex biogenesis	biological_process	8	37	713	480	16650	0.000801121
GO:1903827	regulation of cellular protein localization	biological_process	7	36	713	562	16650	0.0168771
GO:0043547	positive regulation of GTPase activity	biological_process	6	36	713	634	16650	0.0744729
GO:0051640	organelle localization	biological_process	8	35	713	489	16650	0.00378646
GO:0033044	regulation of chromosome organization	biological_process	11	34	713	288	16650	2.60635e-07
GO:1901987	regulation of cell cycle phase transition	biological_process	5	33	713	336	16650	2.03871e-05
GO:0000226	microtubule cytoskeleton organization	biological_process	7	33	713	428	16650	0.00160366
GO:0071407	cellular response to organic cyclic compound	biological_process	5	33	713	520	16650	0.0257742
GO:0045930	negative regulation of mitotic cell cycle	biological_process	11	32	713	219	16650	4.44133e-09
GO:0000075	cell cycle checkpoint	biological_process	6	32	713	229	16650	1.30932e-08
GO:1901990	regulation of mitotic cell cycle phase transition	biological_process	10	32	713	312	16650	1.18999e-05
GO:0051656	establishment of organelle localization	biological_process	11	32	713	420	16650	0.00230399
GO:0022411	cellular component disassembly	biological_process	10	32	713	502	16650	0.0263187
GO:0034660	ncRNA metabolic process	biological_process	9	32	713	570	16650	0.0995408
GO:0071103	DNA conformation change	biological_process	8	30	713	284	16650	1.35143e-05
GO:0045787	positive regulation of cell cycle	biological_process	10	30	713	339	16650	0.000315794
GO:0019058	viral life cycle	biological_process	6	30	713	455	16650	0.0213713
GO:0006417	regulation of translation	biological_process	6	29	713	343	16650	0.000835763
GO:0034248	regulation of cellular amide metabolic process	biological_process	9	29	713	374	16650	0.00299469
GO:0043161	proteasome-mediated ubiquitin-dependent protein catabolic process	biological_process	7	29	713	375	16650	0.00310766
GO:0010498	proteasomal protein catabolic process	biological_process	9	29	713	403	16650	0.00819324
GO:0006914	autophagy	biological_process	8	29	713	418	16650	0.0129805
GO:0032386	regulation of intracellular transport	biological_process	7	29	713	472	16650	0.0506281
GO:0007093	mitotic cell cycle checkpoint	biological_process	8	27	713	159	16650	3.68062e-09
GO:0007062	sister chromatid cohesion	biological_process	11	26	713	128	16650	1.53613e-10
GO:0000070	mitotic sister chromatid segregation	biological_process	12	26	713	142	16650	1.51975e-09
GO:0071824	protein-DNA complex subunit organization	biological_process	11	26	713	262	16650	0.000155324
GO:0006260	DNA replication	biological_process	6	26	713	290	16650	0.000718908
GO:0010639	negative regulation of organelle organization	biological_process	7	26	713	313	16650	0.00208848
GO:0034504	protein localization to nucleus	biological_process	13	26	713	363	16650	0.0133171
GO:0006302	double-strand break repair	biological_process	9	25	713	206	16650	8.32539e-06
GO:0006403	RNA localization	biological_process	4	25	713	211	16650	1.25267e-05
GO:0040029	regulation of gene expression, epigenetic	biological_process	5	25	713	263	16650	0.000404774
GO:0001701	in utero embryonic development	biological_process	5	25	713	331	16650	0.00838837
GO:0010948	negative regulation of cell cycle process	biological_process	11	24	713	240	16650	0.000264015
GO:0090068	positive regulation of cell cycle process	biological_process	6	24	713	251	16650	0.000500377
GO:0006473	protein acetylation	biological_process	7	23	713	189	16650	1.98868e-05
GO:0043543	protein acylation	biological_process	6	23	713	221	16650	0.000208233
GO:0000209	protein polyubiquitination	biological_process	9	23	713	252	16650	0.00126254
GO:0016458	gene silencing	biological_process	10	23	713	253	16650	0.00130951
GO:0006310	DNA recombination	biological_process	7	23	713	262	16650	0.00203914
GO:0051170	nuclear import	biological_process	11	23	713	299	16650	0.00963232
GO:0045862	positive regulation of proteolysis	biological_process	10	23	713	358	16650	0.0567931
GO:1903829	positive regulation of cellular protein localization	biological_process	7	23	713	363	16650	0.0640339
GO:0042176	regulation of protein catabolic process	biological_process	13	23	713	370	16650	0.0750882
GO:0033157	regulation of intracellular protein transport	biological_process	7	23	713	373	16650	0.0799284
GO:0018394	peptidyl-lysine acetylation	biological_process	6	22	713	163	16650	6.36265e-06
GO:0015931	nucleobase-containing compound transport	biological_process	6	22	713	211	16650	0.000288606
GO:0042787	protein ubiquitination involved in ubiquitin-dependent protein catabolic process	biological_process	5	22	713	222	16650	0.000570187
GO:0071826	ribonucleoprotein complex subunit organization	biological_process	8	22	713	223	16650	0.00060511
GO:0007265	Ras protein signal transduction	biological_process	5	22	713	320	16650	0.0346948
GO:0042254	ribosome biogenesis	biological_process	8	22	713	335	16650	0.0521084
GO:0060249	anatomical structure homeostasis	biological_process	3	22	713	352	16650	0.0792374
GO:0009101	glycoprotein biosynthetic process	biological_process	8	22	713	354	16650	0.0820254
GO:0050658	RNA transport	biological_process	6	21	713	176	16650	6.59574e-05
GO:0050657	nucleic acid transport	biological_process	7	21	713	176	16650	6.59574e-05
GO:0051236	establishment of RNA localization	biological_process	11	21	713	179	16650	8.36524e-05
GO:0051168	nuclear export	biological_process	7	21	713	185	16650	0.00013209
GO:0006323	DNA packaging	biological_process	8	21	713	205	16650	0.000516157
GO:0022618	ribonucleoprotein complex assembly	biological_process	9	21	713	212	16650	0.000789949
GO:0044033	multi-organism metabolic process	biological_process	7	21	713	214	16650	0.000888146
GO:0006352	DNA-templated transcription, initiation	biological_process	6	21	713	231	16650	0.00223677
GO:0065004	protein-DNA complex assembly	biological_process	12	21	713	235	16650	0.002731
GO:0031396	regulation of protein ubiquitination	biological_process	10	21	713	253	16650	0.00623542
GO:0030522	intracellular receptor signaling pathway	biological_process	8	21	713	261	16650	0.00867587
GO:0010506	regulation of autophagy	biological_process	11	21	713	269	16650	0.0118629
GO:1903320	regulation of protein modification by small protein conjugation or removal	biological_process	9	21	713	276	16650	0.0151656
GO:0017038	protein import	biological_process	9	21	713	329	16650	0.0729173
GO:2001251	negative regulation of chromosome organization	biological_process	12	20	713	109	16650	1.65006e-07
GO:0043487	regulation of RNA stability	biological_process	10	20	713	152	16650	2.67418e-05
GO:1901991	negative regulation of mitotic cell cycle phase transition	biological_process	10	20	713	154	16650	3.21559e-05
GO:0031570	DNA integrity checkpoint	biological_process	6	20	713	158	16650	4.5998e-05
GO:1901988	negative regulation of cell cycle phase transition	biological_process	6	20	713	166	16650	9.04055e-05
GO:0071897	DNA biosynthetic process	biological_process	10	20	713	201	16650	0.00103221
GO:0051054	positive regulation of DNA metabolic process	biological_process	10	20	713	202	16650	0.00109506
GO:0051321	meiotic cell cycle	biological_process	7	20	713	230	16650	0.00474438
GO:0034330	cell junction organization	biological_process	6	20	713	249	16650	0.0107936
GO:0007009	plasma membrane organization	biological_process	7	20	713	277	16650	0.02938
GO:0048511	rhythmic process	biological_process	13	20	713	312	16650	0.0779918
GO:1903311	regulation of mRNA metabolic process	biological_process	9	19	713	133	16650	1.45762e-05
GO:0043488	regulation of mRNA stability	biological_process	16	19	713	145	16650	4.74557e-05
GO:0000077	DNA damage checkpoint	biological_process	9	19	713	148	16650	6.2312e-05
GO:0070646	protein modification by small protein removal	biological_process	6	19	713	154	16650	0.000104825
GO:0071214	cellular response to abiotic stimulus	biological_process	9	19	713	268	16650	0.0397098
GO:0090305	nucleic acid phosphodiester bond hydrolysis	biological_process	9	19	713	278	16650	0.0532582
GO:0006486	protein glycosylation	biological_process	8	19	713	279	16650	0.0550698
GO:0043413	macromolecule glycosylation	biological_process	8	19	713	279	16650	0.0550698
GO:0044744	protein targeting to nucleus	biological_process	9	19	713	280	16650	0.0562731
GO:0006606	protein import into nucleus	biological_process	9	19	713	280	16650	0.0562731
GO:1902593	single-organism nuclear import	biological_process	4	19	713	281	16650	0.0569173
GO:0070085	glycosylation	biological_process	6	19	713	289	16650	0.070366
GO:0051056	regulation of small GTPase mediated signal transduction	biological_process	4	19	713	299	16650	0.0915884
GO:0050684	regulation of mRNA processing	biological_process	5	18	713	104	16650	1.86428e-06
GO:0071166	ribonucleoprotein complex localization	biological_process	8	18	713	125	16650	2.34786e-05
GO:0016573	histone acetylation	biological_process	6	18	713	145	16650	0.000155726
GO:0051028	mRNA transport	biological_process	6	18	713	146	16650	0.000169393
GO:0018393	internal peptidyl-lysine acetylation	biological_process	14	18	713	150	16650	0.000235089
GO:0006475	internal protein amino acid acetylation	biological_process	6	18	713	156	16650	0.000374886
GO:0051783	regulation of nuclear division	biological_process	9	18	713	164	16650	0.000669134
GO:0019080	viral gene expression	biological_process	6	18	713	192	16650	0.0036811
GO:0045216	cell-cell junction organization	biological_process	5	18	713	218	16650	0.0125922
GO:0031647	regulation of protein stability	biological_process	4	18	713	228	16650	0.0189411
GO:0050792	regulation of viral process	biological_process	5	18	713	262	16650	0.0581391
GO:0043414	macromolecule methylation	biological_process	6	18	713	266	16650	0.0658039
GO:0051983	regulation of chromosome segregation	biological_process	9	17	713	84	16650	4.45988e-07
GO:0043484	regulation of RNA splicing	biological_process	12	17	713	109	16650	1.54002e-05
GO:0007088	regulation of mitotic nuclear division	biological_process	8	17	713	140	16650	0.000322948
GO:0006338	chromatin remodeling	biological_process	11	17	713	166	16650	0.00204469
GO:0019083	viral transcription	biological_process	9	17	713	181	16650	0.00483122
GO:0044839	cell cycle G2/M phase transition	biological_process	7	17	713	197	16650	0.0106198
GO:1900180	regulation of protein localization to nucleus	biological_process	8	17	713	218	16650	0.0252733
GO:0044843	cell cycle G1/S phase transition	biological_process	9	17	713	244	16650	0.0600821
GO:0044774	mitotic DNA integrity checkpoint	biological_process	10	16	713	107	16650	4.89882e-05
GO:0071426	ribonucleoprotein complex export from nucleus	biological_process	10	16	713	118	16650	0.0001522
GO:0006405	RNA export from nucleus	biological_process	7	16	713	123	16650	0.000242236
GO:0017148	negative regulation of translation	biological_process	14	16	713	147	16650	0.00158895
GO:0034249	negative regulation of cellular amide metabolic process	biological_process	12	16	713	155	16650	0.00267577
GO:2001020	regulation of response to DNA damage stimulus	biological_process	10	16	713	158	16650	0.00321635
GO:1901796	regulation of signal transduction by p53 class mediator	biological_process	5	16	713	163	16650	0.00431489
GO:0031398	positive regulation of protein ubiquitination	biological_process	6	16	713	182	16650	0.0115655
GO:0034329	cell junction assembly	biological_process	8	16	713	192	16650	0.0180799
GO:1903322	positive regulation of protein modification by small protein conjugation or removal	biological_process	9	16	713	198	16650	0.0231523
GO:0016236	macroautophagy	biological_process	8	16	713	203	16650	0.0281397
GO:0046822	regulation of nucleocytoplasmic transport	biological_process	NA	16	713	214	16650	0.0418417
GO:0000082	G1/S transition of mitotic cell cycle	biological_process	9	16	713	224	16650	0.0579668
GO:1990778	protein localization to cell periphery	biological_process	7	16	713	226	16650	0.0616327
GO:0007050	cell cycle arrest	biological_process	4	16	713	235	16650	0.080063
GO:0071383	cellular response to steroid hormone stimulus	biological_process	8	16	713	241	16650	0.0941502
GO:0038093	Fc receptor signaling pathway	biological_process	4	16	713	243	16650	0.0991634
GO:0048024	regulation of mRNA splicing, via spliceosome	biological_process	8	15	713	70	16650	1.25865e-06
GO:0044773	mitotic DNA damage checkpoint	biological_process	9	15	713	100	16650	8.80289e-05
GO:0051053	negative regulation of DNA metabolic process	biological_process	12	15	713	116	16650	0.000430151
GO:0000910	cytokinesis	biological_process	7	15	713	120	16650	0.000608103
GO:0016579	protein deubiquitination	biological_process	5	15	713	137	16650	0.00221318
GO:0006261	DNA-dependent DNA replication	biological_process	11	15	713	145	16650	0.00373089
GO:0032200	telomere organization	biological_process	9	15	713	147	16650	0.00421977
GO:0000086	G2/M transition of mitotic cell cycle	biological_process	6	15	713	183	16650	0.0256575
GO:1903046	meiotic cell cycle process	biological_process	5	15	713	189	16650	0.0325608
GO:0006333	chromatin assembly or disassembly	biological_process	12	15	713	191	16650	0.0351366
GO:0072659	protein localization to plasma membrane	biological_process	11	15	713	207	16650	0.0612016
GO:0002064	epithelial cell development	biological_process	9	15	713	211	16650	0.069342
GO:0006282	regulation of DNA repair	biological_process	10	14	713	83	16650	4.77799e-05
GO:0006354	DNA-templated transcription, elongation	biological_process	8	14	713	119	16650	0.00172894
GO:0000723	telomere maintenance	biological_process	4	14	713	134	16650	0.00489426
GO:1902275	regulation of chromatin organization	biological_process	6	14	713	160	16650	0.019955
GO:0031497	chromatin assembly	biological_process	7	14	713	167	16650	0.0272254
GO:0006367	transcription initiation from RNA polymerase II promoter	biological_process	9	14	713	174	16650	0.0362704
GO:0034728	nucleosome organization	biological_process	5	14	713	178	16650	0.04231
GO:0007126	meiotic nuclear division	biological_process	8	14	713	180	16650	0.0455805
GO:1903364	positive regulation of cellular protein catabolic process	biological_process	7	14	713	186	16650	0.0564369
GO:0006368	transcription elongation from RNA polymerase II promoter	biological_process	9	13	713	97	16650	0.000868744
GO:0071427	mRNA-containing ribonucleoprotein complex export from nucleus	biological_process	7	13	713	104	16650	0.00160649
GO:0006406	mRNA export from nucleus	biological_process	10	13	713	104	16650	0.00160649
GO:0006275	regulation of DNA replication	biological_process	6	13	713	117	16650	0.0043135
GO:0030518	intracellular steroid hormone receptor signaling pathway	biological_process	11	13	713	127	16650	0.00824197
GO:0001889	liver development	biological_process	8	13	713	130	16650	0.00984777
GO:0016925	protein sumoylation	biological_process	9	13	713	133	16650	0.0116862
GO:0061008	hepaticobiliary system development	biological_process	6	13	713	133	16650	0.0116862
GO:0045814	negative regulation of gene expression, epigenetic	biological_process	7	13	713	136	16650	0.0137778
GO:0010212	response to ionizing radiation	biological_process	7	13	713	144	16650	0.0207505
GO:0007259	JAK-STAT cascade	biological_process	6	13	713	171	16650	0.063464
GO:1903052	positive regulation of proteolysis involved in cellular protein catabolic process	biological_process	10	13	713	171	16650	0.063464
GO:0007623	circadian rhythm	biological_process	6	13	713	172	16650	0.0657117
GO:0097696	STAT cascade	biological_process	7	13	713	176	16650	0.0752209
GO:1903900	regulation of viral life cycle	biological_process	5	13	713	177	16650	0.0777287
GO:0043401	steroid hormone mediated signaling pathway	biological_process	15	13	713	180	16650	0.085568
GO:0007254	JNK cascade	biological_process	10	13	713	183	16650	0.0938827
GO:0051304	chromosome separation	biological_process	7	12	713	73	16650	0.000256329
GO:0051817	modification of morphology or physiology of other organism involved in symbiotic interaction	biological_process	8	12	713	93	16650	0.00203111
GO:0035821	modification of morphology or physiology of other organism	biological_process	9	12	713	112	16650	0.00845356
GO:0006342	chromatin silencing	biological_process	8	12	713	119	16650	0.0130145
GO:0048706	embryonic skeletal system development	biological_process	7	12	713	123	16650	0.0163464
GO:0031397	negative regulation of protein ubiquitination	biological_process	6	12	713	129	16650	0.0224881
GO:0051302	regulation of cell division	biological_process	8	12	713	133	16650	0.0274271
GO:1903321	negative regulation of protein modification by small protein conjugation or removal	biological_process	7	12	713	140	16650	0.0378735
GO:0090002	establishment of protein localization to plasma membrane	biological_process	7	12	713	142	16650	0.0413084
GO:0006997	nucleus organization	biological_process	9	12	713	144	16650	0.044953
GO:0031047	gene silencing by RNA	biological_process	14	12	713	159	16650	0.0793681
GO:0072331	signal transduction by p53 class mediator	biological_process	11	12	713	166	16650	0.0998895
GO:0033045	regulation of sister chromatid segregation	biological_process	6	11	713	67	16650	0.000524028
GO:0031145	anaphase-promoting complex-dependent catabolic process	biological_process	6	11	713	79	16650	0.00192381
GO:0032392	DNA geometric change	biological_process	12	11	713	81	16650	0.00232416
GO:0006476	protein deacetylation	biological_process	6	11	713	94	16650	0.00682714
GO:0035601	protein deacylation	biological_process	6	11	713	99	16650	0.00973741
GO:0098732	macromolecule deacylation	biological_process	10	11	713	100	16650	0.0104185
GO:2000058	regulation of protein ubiquitination involved in ubiquitin-dependent protein catabolic process	biological_process	7	11	713	101	16650	0.0111352
GO:0007051	spindle organization	biological_process	8	11	713	110	16650	0.0193721
GO:0051438	regulation of ubiquitin-protein transferase activity	biological_process	9	11	713	119	16650	0.0313783
GO:0016241	regulation of macroautophagy	biological_process	5	11	713	124	16650	0.0399413
GO:0034614	cellular response to reactive oxygen species	biological_process	3	11	713	125	16650	0.0418289
GO:0034502	protein localization to chromosome	biological_process	8	10	713	60	16650	0.000951045
GO:0032204	regulation of telomere maintenance	biological_process	11	10	713	68	16650	0.00234189
GO:0006303	double-strand break repair via nonhomologous end joining	biological_process	9	10	713	69	16650	0.00259335
GO:0000726	non-recombinational repair	biological_process	11	10	713	75	16650	0.00458392
GO:0032508	DNA duplex unwinding	biological_process	6	10	713	76	16650	0.00500768
GO:0045815	positive regulation of gene expression, epigenetic	biological_process	10	10	713	79	16650	0.00646296
GO:1904668	positive regulation of ubiquitin protein ligase activity	biological_process	8	10	713	82	16650	0.00822302
GO:0007043	cell-cell junction assembly	biological_process	7	10	713	86	16650	0.0111091
GO:1904666	regulation of ubiquitin protein ligase activity	biological_process	8	10	713	86	16650	0.0111091
GO:2000060	positive regulation of protein ubiquitination involved in ubiquitin-dependent protein catabolic process	biological_process	7	10	713	91	16650	0.0157103
GO:0048704	embryonic skeletal system morphogenesis	biological_process	6	10	713	93	16650	0.0178956
GO:0051101	regulation of DNA binding	biological_process	8	10	713	97	16650	0.0229162
GO:0051443	positive regulation of ubiquitin-protein transferase activity	biological_process	11	10	713	103	16650	0.0322219
GO:0006353	DNA-templated transcription, termination	biological_process	5	10	713	103	16650	0.0322219
GO:0002223	stimulatory C-type lectin receptor signaling pathway	biological_process	9	10	713	105	16650	0.0358334
GO:0002220	innate immune response activating cell surface receptor signaling pathway	biological_process	7	10	713	107	16650	0.0397133
GO:0032606	type I interferon production	biological_process	8	10	713	108	16650	0.041756
GO:0071156	regulation of cell cycle arrest	biological_process	5	10	713	108	16650	0.041756
GO:0032479	regulation of type I interferon production	biological_process	6	10	713	112	16650	0.050631
GO:1900182	positive regulation of protein localization to nucleus	biological_process	7	10	713	128	16650	0.0979527
GO:2000779	regulation of double-strand break repair	biological_process	6	9	713	42	16650	0.000348851
GO:0045839	negative regulation of mitotic nuclear division	biological_process	6	9	713	44	16650	0.00048582
GO:0036297	interstrand cross-link repair	biological_process	7	9	713	50	16650	0.00117461
GO:0034508	centromere complex assembly	biological_process	9	9	713	54	16650	0.00195958
GO:0010389	regulation of G2/M transition of mitotic cell cycle	biological_process	9	9	713	56	16650	0.00248254
GO:0051784	negative regulation of nuclear division	biological_process	9	9	713	56	16650	0.00248254
GO:0033047	regulation of mitotic sister chromatid segregation	biological_process	12	9	713	56	16650	0.00248254
GO:0051851	modification by host of symbiont morphology or physiology	biological_process	7	9	713	56	16650	0.00248254
GO:0051702	interaction with symbiont	biological_process	8	9	713	58	16650	0.00310881
GO:1902749	regulation of cell cycle G2/M phase transition	biological_process	NA	9	713	64	16650	0.00574097
GO:0046782	regulation of viral transcription	biological_process	6	9	713	66	16650	0.00691628
GO:0000731	DNA synthesis involved in DNA repair	biological_process	6	9	713	74	16650	0.0134967
GO:0051437	positive regulation of ubiquitin-protein ligase activity involved in regulation of mitotic cell cycle transition	biological_process	5	9	713	76	16650	0.0156848
GO:1903008	organelle disassembly	biological_process	10	9	713	77	16650	0.0168702
GO:0071158	positive regulation of cell cycle arrest	biological_process	10	9	713	85	16650	0.0287621
GO:0051225	spindle assembly	biological_process	11	9	713	90	16650	0.0385936
GO:0014013	regulation of gliogenesis	biological_process	NA	9	713	94	16650	0.047913
GO:0007030	Golgi organization	biological_process	8	9	713	94	16650	0.047913
GO:0045446	endothelial cell differentiation	biological_process	7	9	713	95	16650	0.0504526
GO:0098781	ncRNA transcription	biological_process	9	9	713	98	16650	0.0585866
GO:0048524	positive regulation of viral process	biological_process	9	9	713	107	16650	0.0877148
GO:0033048	negative regulation of mitotic sister chromatid segregation	biological_process	8	8	713	35	16650	0.000598822
GO:0048255	mRNA stabilization	biological_process	11	8	713	36	16650	0.000716289
GO:0031572	G2 DNA damage checkpoint	biological_process	8	8	713	36	16650	0.000716289
GO:0033046	negative regulation of sister chromatid segregation	biological_process	5	8	713	37	16650	0.000851268
GO:0043489	RNA stabilization	biological_process	7	8	713	37	16650	0.000851268
GO:0051985	negative regulation of chromosome segregation	biological_process	5	8	713	38	16650	0.00100554
GO:0000381	regulation of alternative mRNA splicing, via spliceosome	biological_process	8	8	713	38	16650	0.00100554
GO:0070830	bicellular tight junction assembly	biological_process	7	8	713	38	16650	0.00100554
GO:0031577	spindle checkpoint	biological_process	6	8	713	39	16650	0.00118095
GO:0061640	cytoskeleton-dependent cytokinesis	biological_process	7	8	713	41	16650	0.0016031
GO:0007091	metaphase/anaphase transition of mitotic cell cycle	biological_process	7	8	713	42	16650	0.00185395
GO:0043297	apical junction assembly	biological_process	5	8	713	47	16650	0.00359448
GO:0030071	regulation of mitotic metaphase/anaphase transition	biological_process	7	8	713	47	16650	0.00359448
GO:1902099	regulation of metaphase/anaphase transition of cell cycle	biological_process	12	8	713	48	16650	0.00405623
GO:0010965	regulation of mitotic sister chromatid separation	biological_process	7	8	713	49	16650	0.00456154
GO:0044784	metaphase/anaphase transition of cell cycle	biological_process	8	8	713	50	16650	0.0051129
GO:0051306	mitotic sister chromatid separation	biological_process	7	8	713	51	16650	0.00571284
GO:0001885	endothelial cell development	biological_process	9	8	713	59	16650	0.0125657
GO:0000018	regulation of DNA recombination	biological_process	8	8	713	63	16650	0.0176199
GO:0033143	regulation of intracellular steroid hormone receptor signaling pathway	biological_process	NA	8	713	64	16650	0.0190787
GO:0006369	termination of RNA polymerase II transcription	biological_process	8	8	713	64	16650	0.0190787
GO:0042509	regulation of tyrosine phosphorylation of STAT protein	biological_process	8	8	713	69	16650	0.0276504
GO:0051303	establishment of chromosome localization	biological_process	7	8	713	69	16650	0.0276504
GO:0050000	chromosome localization	biological_process	12	8	713	70	16650	0.0296336
GO:0051436	negative regulation of ubiquitin-protein ligase activity involved in mitotic cell cycle	biological_process	10	8	713	71	16650	0.0317106
GO:0051439	regulation of ubiquitin-protein ligase activity involved in mitotic cell cycle	biological_process	NA	8	713	72	16650	0.0338828
GO:0007260	tyrosine phosphorylation of STAT protein	biological_process	6	8	713	73	16650	0.0361516
GO:1904667	negative regulation of ubiquitin protein ligase activity	biological_process	8	8	713	73	16650	0.0361516
GO:0007098	centrosome cycle	biological_process	9	8	713	78	16650	0.0489901
GO:0046427	positive regulation of JAK-STAT cascade	biological_process	7	8	713	79	16650	0.0518638
GO:1904894	positive regulation of STAT cascade	biological_process	9	8	713	79	16650	0.0518638
GO:0043044	ATP-dependent chromatin remodeling	biological_process	12	8	713	80	16650	0.0548414
GO:0051444	negative regulation of ubiquitin-protein transferase activity	biological_process	6	8	713	80	16650	0.0548414
GO:0031109	microtubule polymerization or depolymerization	biological_process	10	8	713	81	16650	0.0579235
GO:0016575	histone deacetylation	biological_process	8	8	713	82	16650	0.0611104
GO:0006890	retrograde vesicle-mediated transport, Golgi to ER	biological_process	9	8	713	82	16650	0.0611104
GO:0006998	nuclear envelope organization	biological_process	7	8	713	85	16650	0.071304
GO:0048013	ephrin receptor signaling pathway	biological_process	7	8	713	87	16650	0.0786277
GO:0001892	embryonic placenta development	biological_process	9	8	713	90	16650	0.0904023
GO:0007569	cell aging	biological_process	7	8	713	91	16650	0.0945359
GO:0052472	modulation by host of symbiont transcription	biological_process	8	7	713	24	16650	0.000415953
GO:0043921	modulation by host of viral transcription	biological_process	7	7	713	24	16650	0.000415953
GO:0052312	modulation of transcription in other organism involved in symbiotic interaction	biological_process	9	7	713	25	16650	0.000527689
GO:0007094	mitotic spindle assembly checkpoint	biological_process	16	7	713	26	16650	0.000661427
GO:0071173	spindle assembly checkpoint	biological_process	NA	7	713	27	16650	0.000819975
GO:0070897	DNA-templated transcriptional preinitiation complex assembly	biological_process	7	7	713	29	16650	0.00122348
GO:0071174	mitotic spindle checkpoint	biological_process	9	7	713	33	16650	0.00246723
GO:2000816	negative regulation of mitotic sister chromatid separation	biological_process	14	7	713	33	16650	0.00246723
GO:0045841	negative regulation of mitotic metaphase/anaphase transition	biological_process	7	7	713	33	16650	0.00246723
GO:1902100	negative regulation of metaphase/anaphase transition of cell cycle	biological_process	6	7	713	34	16650	0.00288938
GO:0030261	chromosome condensation	biological_process	10	7	713	34	16650	0.00288938
GO:0007077	mitotic nuclear envelope disassembly	biological_process	6	7	713	44	16650	0.0105788
GO:2000273	positive regulation of receptor activity	biological_process	6	7	713	45	16650	0.0117768
GO:0043392	negative regulation of DNA binding	biological_process	NA	7	713	47	16650	0.0144535
GO:0032206	positive regulation of telomere maintenance	biological_process	8	7	713	48	16650	0.0159388
GO:0051081	nuclear envelope disassembly	biological_process	6	7	713	48	16650	0.0159388
GO:0030397	membrane disassembly	biological_process	10	7	713	48	16650	0.0159388
GO:0016233	telomere capping	biological_process	10	7	713	48	16650	0.0159388
GO:0006336	DNA replication-independent nucleosome assembly	biological_process	8	7	713	54	16650	0.0270975
GO:0034724	DNA replication-independent nucleosome organization	biological_process	11	7	713	55	16650	0.0293565
GO:0000245	spliceosomal complex assembly	biological_process	8	7	713	56	16650	0.0317357
GO:0000422	mitophagy	biological_process	10	7	713	56	16650	0.0317357
GO:0061726	mitochondrion disassembly	biological_process	9	7	713	56	16650	0.0317357
GO:0032922	circadian regulation of gene expression	biological_process	11	7	713	57	16650	0.0342369
GO:0071479	cellular response to ionizing radiation	biological_process	8	7	713	58	16650	0.036862
GO:0042531	positive regulation of tyrosine phosphorylation of STAT protein	biological_process	8	7	713	61	16650	0.0454952
GO:0002200	somatic diversification of immune receptors	biological_process	12	7	713	65	16650	0.058814
GO:0032465	regulation of cytokinesis	biological_process	9	7	713	66	16650	0.0624708
GO:0009301	snRNA transcription	biological_process	8	7	713	70	16650	0.0784093
GO:0042795	snRNA transcription from RNA polymerase II promoter	biological_process	11	7	713	70	16650	0.0784093
GO:0048332	mesoderm morphogenesis	biological_process	5	7	713	71	16650	0.08272
GO:0032481	positive regulation of type I interferon production	biological_process	NA	7	713	71	16650	0.08272
GO:0044819	mitotic G1/S transition checkpoint	biological_process	13	7	713	72	16650	0.0871597
GO:0031571	mitotic G1 DNA damage checkpoint	biological_process	6	7	713	72	16650	0.0871597
GO:2001022	positive regulation of response to DNA damage stimulus	biological_process	10	7	713	72	16650	0.0871597
GO:0044783	G1 DNA damage checkpoint	biological_process	7	7	713	73	16650	0.0917276
GO:0044766	multi-organism transport	biological_process	7	7	713	74	16650	0.0964225
GO:1902579	multi-organism localization	biological_process	8	7	713	74	16650	0.0964225
GO:0090559	regulation of membrane permeability	biological_process	7	7	713	74	16650	0.0964225
GO:0051988	regulation of attachment of spindle microtubules to kinetochore	biological_process	7	6	713	11	16650	5.25357e-05
GO:0007095	mitotic G2 DNA damage checkpoint	biological_process	12	6	713	16	16650	0.000415427
GO:0044818	mitotic G2/M transition checkpoint	biological_process	8	6	713	23	16650	0.00249614
GO:0031935	regulation of chromatin silencing	biological_process	6	6	713	23	16650	0.00249614
GO:0010972	negative regulation of G2/M transition of mitotic cell cycle	biological_process	13	6	713	27	16650	0.00520069
GO:1902750	negative regulation of cell cycle G2/M phase transition	biological_process	NA	6	713	29	16650	0.00713106
GO:0050686	negative regulation of mRNA processing	biological_process	8	6	713	31	16650	0.0095121
GO:0000281	mitotic cytokinesis	biological_process	NA	6	713	33	16650	0.0123893
GO:1903312	negative regulation of mRNA metabolic process	biological_process	8	6	713	37	16650	0.0197953
GO:0038128	ERBB2 signaling pathway	biological_process	12	6	713	39	16650	0.0243941
GO:0000060	protein import into nucleus, translocation	biological_process	9	6	713	41	16650	0.0296283
GO:0006284	base-excision repair	biological_process	7	6	713	42	16650	0.0324907
GO:0045739	positive regulation of DNA repair	biological_process	5	6	713	43	16650	0.0355198
GO:0090307	mitotic spindle assembly	biological_process	11	6	713	44	16650	0.0387174
GO:0032210	regulation of telomere maintenance via telomerase	biological_process	6	6	713	45	16650	0.0420849
GO:0042516	regulation of tyrosine phosphorylation of Stat3 protein	biological_process	9	6	713	45	16650	0.0420849
GO:1902850	microtubule cytoskeleton organization involved in mitosis	biological_process	8	6	713	45	16650	0.0420849
GO:0090329	regulation of DNA-dependent DNA replication	biological_process	10	6	713	45	16650	0.0420849
GO:0042503	tyrosine phosphorylation of Stat3 protein	biological_process	12	6	713	45	16650	0.0420849
GO:1905268	negative regulation of chromatin organization	biological_process	11	6	713	46	16650	0.0456237
GO:0031055	chromatin remodeling at centromere	biological_process	8	6	713	47	16650	0.0493344
GO:0051310	metaphase plate congression	biological_process	NA	6	713	48	16650	0.0532176
GO:1904356	regulation of telomere maintenance via telomere lengthening	biological_process	14	6	713	50	16650	0.0615017
GO:1902117	positive regulation of organelle assembly	biological_process	8	6	713	53	16650	0.0752145
GO:0002181	cytoplasmic translation	biological_process	10	6	713	53	16650	0.0752145
GO:0002562	somatic diversification of immune receptors via germline recombination within a single locus	biological_process	10	6	713	54	16650	0.0801244
GO:0016444	somatic cell DNA recombination	biological_process	6	6	713	54	16650	0.0801244
GO:0006301	postreplication repair	biological_process	7	6	713	55	16650	0.0852012
GO:2000573	positive regulation of DNA biosynthetic process	biological_process	7	6	713	57	16650	0.0958474
GO:0071459	protein localization to chromosome, centromeric region	biological_process	10	5	713	15	16650	0.00310261
GO:0033158	regulation of protein import into nucleus, translocation	biological_process	7	5	713	17	16650	0.00505385
GO:0039703	RNA replication	biological_process	12	5	713	21	16650	0.0110994
GO:0010569	regulation of double-strand break repair via homologous recombination	biological_process	8	5	713	21	16650	0.0110994
GO:0010869	regulation of receptor biosynthetic process	biological_process	11	5	713	21	16650	0.0110994
GO:0039694	viral RNA genome replication	biological_process	12	5	713	21	16650	0.0110994
GO:0070932	histone H3 deacetylation	biological_process	11	5	713	22	16650	0.0131161
GO:1904353	regulation of telomere capping	biological_process	11	5	713	22	16650	0.0131161
GO:0032800	receptor biosynthetic process	biological_process	NA	5	713	24	16650	0.0178136
GO:0007064	mitotic sister chromatid cohesion	biological_process	10	5	713	24	16650	0.0178136
GO:0045948	positive regulation of translational initiation	biological_process	7	5	713	24	16650	0.0178136
GO:0051123	RNA polymerase II transcriptional preinitiation complex assembly	biological_process	6	5	713	26	16650	0.0234376
GO:0071108	protein K48-linked deubiquitination	biological_process	11	5	713	26	16650	0.0234376
GO:0006409	tRNA export from nucleus	biological_process	7	5	713	32	16650	0.0461722
GO:0071431	tRNA-containing ribonucleoprotein complex export from nucleus	biological_process	12	5	713	32	16650	0.0461722
GO:0007019	microtubule depolymerization	biological_process	10	5	713	33	16650	0.0508319
GO:0051031	tRNA transport	biological_process	7	5	713	34	16650	0.0557392
GO:0090342	regulation of cell aging	biological_process	9	5	713	35	16650	0.060892
GO:0061028	establishment of endothelial barrier	biological_process	8	5	713	35	16650	0.060892
GO:0000387	spliceosomal snRNP assembly	biological_process	12	5	713	38	16650	0.0777946
GO:2000648	positive regulation of stem cell proliferation	biological_process	7	5	713	38	16650	0.0777946
GO:0042517	positive regulation of tyrosine phosphorylation of Stat3 protein	biological_process	11	5	713	38	16650	0.0777946
GO:0006298	mismatch repair	biological_process	7	5	713	38	16650	0.0777946
GO:0051653	spindle localization	biological_process	14	5	713	40	16650	0.0902272
GO:0051602	response to electrical stimulus	biological_process	13	5	713	40	16650	0.0902272
GO:0007052	mitotic spindle organization	biological_process	7	5	713	40	16650	0.0902272
GO:0019985	translesion synthesis	biological_process	7	5	713	41	16650	0.0967784
GO:0070934	CRD-mediated mRNA stabilization	biological_process	5	4	713	5	16650	0.000729922
GO:0080009	mRNA methylation	biological_process	13	4	713	7	16650	0.00239498
GO:0070933	histone H4 deacetylation	biological_process	7	4	713	9	16650	0.0053901
GO:0031936	negative regulation of chromatin silencing	biological_process	8	4	713	9	16650	0.0053901
GO:0033750	ribosome localization	biological_process	10	4	713	10	16650	0.00745741
GO:0000054	ribosomal subunit export from nucleus	biological_process	8	4	713	10	16650	0.00745741
GO:0033160	positive regulation of protein import into nucleus, translocation	biological_process	9	4	713	10	16650	0.00745741
GO:0033753	establishment of ribosome localization	biological_process	8	4	713	10	16650	0.00745741
GO:0010870	positive regulation of receptor biosynthetic process	biological_process	7	4	713	11	16650	0.00993145
GO:0031507	heterochromatin assembly	biological_process	9	4	713	11	16650	0.00993145
GO:0071428	rRNA-containing ribonucleoprotein complex export from nucleus	biological_process	11	4	713	12	16650	0.0128264
GO:0034501	protein localization to kinetochore	biological_process	NA	4	713	12	16650	0.0128264
GO:0043922	negative regulation by host of viral transcription	biological_process	8	4	713	13	16650	0.0161524
GO:2000780	negative regulation of double-strand break repair	biological_process	8	4	713	13	16650	0.0161524
GO:0070828	heterochromatin organization	biological_process	NA	4	713	14	16650	0.0199155
GO:0016556	mRNA modification	biological_process	5	4	713	14	16650	0.0199155
GO:0045738	negative regulation of DNA repair	biological_process	NA	4	713	15	16650	0.0241187
GO:0045910	negative regulation of DNA recombination	biological_process	11	4	713	17	16650	0.0338422
GO:0035357	peroxisome proliferator activated receptor signaling pathway	biological_process	7	4	713	17	16650	0.0338422
GO:0061157	mRNA destabilization	biological_process	14	4	713	18	16650	0.0393544
GO:0006346	methylation-dependent chromatin silencing	biological_process	NA	4	713	19	16650	0.0452913
GO:0050779	RNA destabilization	biological_process	8	4	713	20	16650	0.0516438
GO:0007063	regulation of sister chromatid cohesion	biological_process	7	4	713	20	16650	0.0516438
GO:0000729	DNA double-strand break processing	biological_process	11	4	713	21	16650	0.0584013
GO:0060969	negative regulation of gene silencing	biological_process	8	4	713	21	16650	0.0584013
GO:0048025	negative regulation of mRNA splicing, via spliceosome	biological_process	11	4	713	21	16650	0.0584013
GO:0016578	histone deubiquitination	biological_process	7	4	713	22	16650	0.0655515
GO:0060396	growth hormone receptor signaling pathway	biological_process	9	4	713	22	16650	0.0655515
GO:0008608	attachment of spindle microtubules to kinetochore	biological_process	10	4	713	22	16650	0.0655515
GO:0042506	tyrosine phosphorylation of Stat5 protein	biological_process	8	4	713	23	16650	0.0730815
GO:0071378	cellular response to growth hormone stimulus	biological_process	NA	4	713	24	16650	0.0809769
GO:0000732	strand displacement	biological_process	NA	4	713	26	16650	0.0978034
GO:0032897	negative regulation of viral transcription	biological_process	11	4	713	26	16650	0.0978034
GO:0032205	negative regulation of telomere maintenance	biological_process	9	4	713	26	16650	0.0978034
GO:0097676	histone H3-K36 dimethylation	biological_process	11	3	713	3	16650	0.00532282
GO:0000056	ribosomal small subunit export from nucleus	biological_process	9	3	713	5	16650	0.0167535
GO:0010216	maintenance of DNA methylation	biological_process	11	3	713	6	16650	0.0244235
GO:0010606	positive regulation of cytoplasmic mRNA processing body assembly	biological_process	6	3	713	6	16650	0.0244235
GO:0034135	regulation of toll-like receptor 2 signaling pathway	biological_process	11	3	713	7	16650	0.0332349
GO:0060789	hair follicle placode formation	biological_process	7	3	713	7	16650	0.0332349
GO:2001032	regulation of double-strand break repair via nonhomologous end joining	biological_process	11	3	713	7	16650	0.0332349
GO:2000774	positive regulation of cellular senescence	biological_process	9	3	713	8	16650	0.0430764
GO:0038180	nerve growth factor signaling pathway	biological_process	5	3	713	8	16650	0.0430764
GO:0016926	protein desumoylation	biological_process	8	3	713	8	16650	0.0430764
GO:0006384	transcription initiation from RNA polymerase III promoter	biological_process	8	3	713	8	16650	0.0430764
GO:0001514	selenocysteine incorporation	biological_process	NA	3	713	9	16650	0.0538439
GO:0090343	positive regulation of cell aging	biological_process	7	3	713	9	16650	0.0538439
GO:0006451	translational readthrough	biological_process	12	3	713	9	16650	0.0538439
GO:0045714	regulation of low-density lipoprotein particle receptor biosynthetic process	biological_process	11	3	713	9	16650	0.0538439
GO:0001778	plasma membrane repair	biological_process	10	3	713	9	16650	0.0538439
GO:0010603	regulation of cytoplasmic mRNA processing body assembly	biological_process	10	3	713	9	16650	0.0538439
GO:0010452	histone H3-K36 methylation	biological_process	10	3	713	10	16650	0.0654405
GO:0048313	Golgi inheritance	biological_process	11	3	713	10	16650	0.0654405
GO:0048308	organelle inheritance	biological_process	6	3	713	11	16650	0.0777758
GO:0090557	establishment of endothelial intestinal barrier	biological_process	12	3	713	11	16650	0.0777758
GO:0033364	mast cell secretory granule organization	biological_process	8	2	713	2	16650	0.0836993
GO:0090402	oncogene-induced cell senescence	biological_process	11	2	713	2	16650	0.0836993
GO:1904923	regulation of mitophagy in response to mitochondrial depolarization	biological_process	NA	2	713	2	16650	0.0836993

## Sheet: Cellulor component
GO_ID	GO_Term	GO_function	GO_class	S.gene.number	TS.gene.number	B.gene.number	TB.gene.number	pvalue
GO:0005654	nucleoplasm	cellulor_component	5	257	629	2996	14527	3.26129e-32
GO:0005829	cytosol	cellulor_component	3	206	629	3399	14527	4.31067e-08
GO:0005694	chromosome	cellulor_component	5	96	629	937	14527	2.77662e-15
GO:0044427	chromosomal part	cellulor_component	6	85	629	827	14527	1.29321e-13
GO:0044451	nucleoplasm part	cellulor_component	3	83	629	741	14527	2.12778e-15
GO:0015630	microtubule cytoskeleton	cellulor_component	7	78	629	1100	14527	1.62534e-05
GO:0005730	nucleolus	cellulor_component	5	70	629	882	14527	1.05558e-06
GO:0030529	intracellular ribonucleoprotein complex	cellulor_component	5	62	629	786	14527	6.06315e-06
GO:1990904	ribonucleoprotein complex	cellulor_component	13	62	629	787	14527	6.26551e-06
GO:0000228	nuclear chromosome	cellulor_component	5	49	629	555	14527	3.62992e-06
GO:0044454	nuclear chromosome part	cellulor_component	7	47	629	519	14527	3.03003e-06
GO:0005815	microtubule organizing center	cellulor_component	8	46	629	647	14527	0.0011224
GO:0098687	chromosomal region	cellulor_component	6	45	629	346	14527	1.19334e-10
GO:0099513	polymeric cytoskeletal fiber	cellulor_component	9	43	629	704	14527	0.0208401
GO:0099512	supramolecular fiber	cellulor_component	7	43	629	704	14527	0.0208401
GO:0016604	nuclear body	cellulor_component	7	42	629	359	14527	1.27784e-08
GO:0000785	chromatin	cellulor_component	11	39	629	472	14527	0.000170883
GO:0048471	perinuclear region of cytoplasm	cellulor_component	5	37	629	639	14527	0.0628923
GO:0005911	cell-cell junction	cellulor_component	8	37	629	644	14527	0.0682602
GO:0005635	nuclear envelope	cellulor_component	NA	35	629	438	14527	0.000706253
GO:0005813	centrosome	cellulor_component	8	35	629	496	14527	0.00544784
GO:0005874	microtubule	cellulor_component	7	34	629	404	14527	0.00034979
GO:0005819	spindle	cellulor_component	8	33	629	303	14527	2.90522e-06
GO:0000775	chromosome, centromeric region	cellulor_component	8	32	629	189	14527	1.32511e-10
GO:0000793	condensed chromosome	cellulor_component	8	29	629	210	14527	1.10324e-07
GO:0016607	nuclear speck	cellulor_component	6	27	629	201	14527	5.69974e-07
GO:0005667	transcription factor complex	cellulor_component	7	27	629	312	14527	0.00107267
GO:0061695	transferase complex, transferring phosphorus-containing groups	cellulor_component	6	25	629	253	14527	0.000262465
GO:0000790	nuclear chromatin	cellulor_component	5	25	629	316	14527	0.00541085
GO:0031965	nuclear membrane	cellulor_component	7	23	629	292	14527	0.00821327
GO:0000151	ubiquitin ligase complex	cellulor_component	6	23	629	294	14527	0.00890889
GO:0005681	spliceosomal complex	cellulor_component	8	22	629	179	14527	3.12057e-05
GO:0005769	early endosome	cellulor_component	10	21	629	312	14527	0.0512262
GO:0000776	kinetochore	cellulor_component	4	20	629	132	14527	3.88816e-06
GO:0000779	condensed chromosome, centromeric region	cellulor_component	7	18	629	112	14527	6.02649e-06
GO:0000428	DNA-directed RNA polymerase complex	cellulor_component	8	17	629	130	14527	0.000152784
GO:0055029	nuclear DNA-directed RNA polymerase complex	cellulor_component	7	17	629	130	14527	0.000152784
GO:0030880	RNA polymerase complex	cellulor_component	9	17	629	132	14527	0.000182849
GO:0035770	ribonucleoprotein granule	cellulor_component	8	17	629	158	14527	0.00135509
GO:0000777	condensed chromosome kinetochore	cellulor_component	7	16	629	103	14527	3.48131e-05
GO:0030496	midbody	cellulor_component	10	16	629	133	14527	0.000627307
GO:0031461	cullin-RING ubiquitin ligase complex	cellulor_component	8	16	629	169	14527	0.0065876
GO:0071013	catalytic step 2 spliceosome	cellulor_component	3	15	629	92	14527	3.83405e-05
GO:0044798	nuclear transcription factor complex	cellulor_component	9	15	629	132	14527	0.00170967
GO:0000922	spindle pole	cellulor_component	7	15	629	133	14527	0.00183701
GO:1902493	acetyltransferase complex	cellulor_component	8	14	629	100	14527	0.000363444
GO:0031248	protein acetyltransferase complex	cellulor_component	6	14	629	100	14527	0.000363444
GO:0036464	cytoplasmic ribonucleoprotein granule	cellulor_component	9	14	629	147	14527	0.0112997
GO:0005875	microtubule associated complex	cellulor_component	6	14	629	149	14527	0.0125582
GO:0000781	chromosome, telomeric region	cellulor_component	6	14	629	163	14527	0.0246231
GO:0000123	histone acetyltransferase complex	cellulor_component	7	13	629	89	14527	0.000432197
GO:0016591	DNA-directed RNA polymerase II, holoenzyme	cellulor_component	5	13	629	104	14527	0.00174997
GO:0072686	mitotic spindle	cellulor_component	6	12	629	59	14527	3.80538e-05
GO:0090575	RNA polymerase II transcription factor complex	cellulor_component	6	12	629	107	14527	0.00650984
GO:0000792	heterochromatin	cellulor_component	4	11	629	72	14527	0.00101142
GO:0000794	condensed nuclear chromosome	cellulor_component	6	11	629	88	14527	0.00459951
GO:0034708	methyltransferase complex	cellulor_component	5	11	629	92	14527	0.0063041
GO:0034399	nuclear periphery	cellulor_component	7	11	629	123	14527	0.0404616
GO:0000784	nuclear chromosome, telomeric region	cellulor_component	9	11	629	132	14527	0.0600681
GO:0005876	spindle microtubule	cellulor_component	8	10	629	59	14527	0.000903222
GO:0005643	nuclear pore	cellulor_component	10	10	629	83	14527	0.00947416
GO:0016363	nuclear matrix	cellulor_component	6	10	629	97	14527	0.0243176
GO:0005871	kinesin complex	cellulor_component	8	9	629	58	14527	0.00331272
GO:0017053	transcriptional repressor complex	cellulor_component	5	9	629	78	14527	0.0191696
GO:0005669	transcription factor TFIID complex	cellulor_component	5	8	629	36	14527	0.000761782
GO:0070461	SAGA-type complex	cellulor_component	9	7	629	34	14527	0.00304432
GO:0005720	nuclear heterochromatin	cellulor_component	8	7	629	34	14527	0.00304432
GO:0005657	replication fork	cellulor_component	6	7	629	64	14527	0.0576445
GO:0045120	pronucleus	cellulor_component	6	6	629	15	14527	0.000310797
GO:0019013	viral nucleocapsid	cellulor_component	5	6	629	28	14527	0.00638885
GO:0035861	site of double-strand break	cellulor_component	13	6	629	31	14527	0.00993161
GO:0019028	viral capsid	cellulor_component	9	6	629	43	14527	0.0369327
GO:1990391	DNA repair complex	cellulor_component	10	6	629	46	14527	0.0473903
GO:0015030	Cajal body	cellulor_component	7	6	629	55	14527	0.0882355
GO:0044423	virion part	cellulor_component	7	6	629	56	14527	0.0936332
GO:0019012	virion	cellulor_component	8	6	629	56	14527	0.0936332
GO:0000124	SAGA complex	cellulor_component	8	5	629	16	14527	0.00415371
GO:0000242	pericentriolar material	cellulor_component	9	5	629	19	14527	0.0079814
GO:0090568	nuclear transcriptional repressor complex	cellulor_component	10	5	629	23	14527	0.01591
GO:0071011	precatalytic spliceosome	cellulor_component	5	5	629	25	14527	0.0212381
GO:0051233	spindle midzone	cellulor_component	10	5	629	27	14527	0.0275391
GO:0000407	pre-autophagosomal structure	cellulor_component	8	5	629	31	14527	0.043163
GO:0000795	synaptonemal complex	cellulor_component	6	5	629	38	14527	0.0802211
GO:0045293	mRNA editing complex	cellulor_component	7	4	629	4	14527	0.000311298
GO:0036396	MIS complex	cellulor_component	7	4	629	4	14527	0.000311298
GO:0070937	CRD-mediated mRNA stability complex	cellulor_component	7	4	629	6	14527	0.00145796
GO:0001939	female pronucleus	cellulor_component	11	4	629	8	14527	0.00382498
GO:0000940	condensed chromosome outer kinetochore	cellulor_component	8	4	629	12	14527	0.0132041
GO:0042405	nuclear inclusion body	cellulor_component	8	4	629	13	14527	0.0166225
GO:0033276	transcription factor TFTC complex	cellulor_component	9	4	629	14	14527	0.0204884
GO:0034045	pre-autophagosomal structure membrane	cellulor_component	7	4	629	16	14527	0.02957
GO:0005671	Ada2/Gcn5/Ada3 transcription activator complex	cellulor_component	13	4	629	16	14527	0.02957
GO:0035145	exon-exon junction complex	cellulor_component	8	4	629	22	14527	0.067264
GO:0005680	anaphase-promoting complex	cellulor_component	8	4	629	23	14527	0.0749671
GO:1990752	microtubule end	cellulor_component	7	4	629	24	14527	0.0830403
GO:0035985	senescence-associated heterochromatin focus	cellulor_component	6	3	629	4	14527	0.0105629
GO:0090571	RNA polymerase II transcription repressor complex	cellulor_component	9	3	629	4	14527	0.0105629
GO:0001940	male pronucleus	cellulor_component	5	3	629	6	14527	0.024925
GO:0005672	transcription factor TFIIA complex	cellulor_component	10	3	629	6	14527	0.024925
GO:0000778	condensed nuclear chromosome kinetochore	cellulor_component	6	3	629	11	14527	0.0792554

## Sheet: Molecule function
GO_ID	GO_Term	GO_function	GO_class	S.gene.number	TS.gene.number	B.gene.number	TB.gene.number	pvalue
GO:0097159	organic cyclic compound binding	Molecule function	5	374	665	6052	15478	3.96554e-20
GO:1901363	heterocyclic compound binding	Molecule function	3	371	665	5971	15478	2.53124e-20
GO:0003676	nucleic acid binding	Molecule function	5	287	665	4097	15478	1.33477e-21
GO:0003677	DNA binding	Molecule function	6	181	665	2562	15478	1.57117e-12
GO:0036094	small molecule binding	Molecule function	3	154	665	2571	15478	7.89292e-06
GO:0000166	nucleotide binding	Molecule function	7	149	665	2389	15478	1.18708e-06
GO:1901265	nucleoside phosphate binding	Molecule function	5	149	665	2390	15478	1.20218e-06
GO:0003723	RNA binding	Molecule function	5	132	665	1656	15478	1.50927e-12
GO:0097367	carbohydrate derivative binding	Molecule function	13	129	665	2241	15478	0.000324828
GO:0001882	nucleoside binding	Molecule function	5	119	665	1860	15478	6.43048e-06
GO:0032555	purine ribonucleotide binding	Molecule function	7	119	665	1884	15478	1.16855e-05
GO:0017076	purine nucleotide binding	Molecule function	8	119	665	1897	15478	1.63733e-05
GO:0032553	ribonucleotide binding	Molecule function	6	119	665	1900	15478	1.7524e-05
GO:0035639	purine ribonucleoside triphosphate binding	Molecule function	9	117	665	1841	15478	1.04063e-05
GO:0032550	purine ribonucleoside binding	Molecule function	7	117	665	1850	15478	1.33763e-05
GO:0032549	ribonucleoside binding	Molecule function	7	117	665	1853	15478	1.44629e-05
GO:0001883	purine nucleoside binding	Molecule function	11	117	665	1853	15478	1.44629e-05
GO:0044822	poly(A) RNA binding	Molecule function	5	112	665	1196	15478	3.37832e-15
GO:0032559	adenyl ribonucleotide binding	Molecule function	8	105	665	1531	15478	1.25344e-06
GO:0030554	adenyl nucleotide binding	Molecule function	NA	105	665	1542	15478	1.7632e-06
GO:0005524	ATP binding	Molecule function	8	102	665	1495	15478	2.34901e-06
GO:0019899	enzyme binding	Molecule function	7	101	665	1789	15478	0.00313635
GO:0044877	macromolecular complex binding	Molecule function	8	91	665	1306	15478	4.02585e-06
GO:0003700	transcription factor activity, sequence-specific DNA binding	Molecule function	8	78	665	1231	15478	0.000486205
GO:0001071	nucleic acid binding transcription factor activity	Molecule function	8	78	665	1232	15478	0.000501227
GO:0008270	zinc ion binding	Molecule function	6	64	665	1169	15478	0.0341994
GO:0017111	nucleoside-triphosphatase activity	Molecule function	7	62	665	779	15478	3.70245e-06
GO:0016462	pyrophosphatase activity	Molecule function	6	62	665	824	15478	2.12214e-05
GO:0016818	hydrolase activity, acting on acid anhydrides, in phosphorus-containing anhydrides	Molecule function	5	62	665	826	15478	2.25996e-05
GO:0016817	hydrolase activity, acting on acid anhydrides	Molecule function	7	62	665	828	15478	2.44838e-05
GO:0043565	sequence-specific DNA binding	Molecule function	6	61	665	1080	15478	0.0233559
GO:0003682	chromatin binding	Molecule function	8	53	665	504	15478	3.91569e-09
GO:0003690	double-stranded DNA binding	Molecule function	10	52	665	805	15478	0.00339027
GO:0044212	transcription regulatory region DNA binding	Molecule function	4	51	665	853	15478	0.0155587
GO:0000975	regulatory region DNA binding	Molecule function	7	51	665	856	15478	0.0161516
GO:0001067	regulatory region nucleic acid binding	Molecule function	8	51	665	857	15478	0.0165204
GO:0016301	kinase activity	Molecule function	7	51	665	924	15478	0.0529158
GO:0008134	transcription factor binding	Molecule function	9	47	665	512	15478	1.72465e-06
GO:0000989	transcription factor activity, transcription factor binding	Molecule function	8	43	665	606	15478	0.0014947
GO:0000988	transcription factor activity, protein binding	Molecule function	7	43	665	612	15478	0.0017935
GO:0016773	phosphotransferase activity, alcohol group as acceptor	Molecule function	10	43	665	784	15478	0.0837578
GO:0000981	RNA polymerase II transcription factor activity, sequence-specific DNA binding	Molecule function	8	42	665	662	15478	0.0115012
GO:1990837	sequence-specific double-stranded DNA binding	Molecule function	3	42	665	725	15478	0.0432262
GO:0016887	ATPase activity	Molecule function	9	39	665	439	15478	3.15582e-05
GO:0004672	protein kinase activity	Molecule function	7	38	665	652	15478	0.0495348
GO:0003712	transcription cofactor activity	Molecule function	8	37	665	552	15478	0.00825547
GO:0019904	protein domain specific binding	Molecule function	6	36	665	614	15478	0.052856
GO:0019787	ubiquitin-like protein transferase activity	Molecule function	9	34	665	439	15478	0.00126917
GO:0000977	RNA polymerase II regulatory region sequence-specific DNA binding	Molecule function	6	34	665	601	15478	0.0854104
GO:0001012	RNA polymerase II regulatory region DNA binding	Molecule function	6	34	665	604	15478	0.0903707
GO:0004842	ubiquitin-protein transferase activity	Molecule function	7	33	665	419	15478	0.00117521
GO:0004674	protein serine/threonine kinase activity	Molecule function	5	30	665	453	15478	0.0207302
GO:0003713	transcription coactivator activity	Molecule function	6	26	665	303	15478	0.00138477
GO:0004386	helicase activity	Molecule function	6	23	665	159	15478	1.1999e-06
GO:0003729	mRNA binding	Molecule function	4	23	665	177	15478	7.22893e-06
GO:0042623	ATPase activity, coupled	Molecule function	6	23	665	326	15478	0.0243784
GO:0001047	core promoter binding	Molecule function	5	22	665	161	15478	5.43214e-06
GO:0008234	cysteine-type peptidase activity	Molecule function	7	22	665	200	15478	0.000142205
GO:0015631	tubulin binding	Molecule function	9	22	665	294	15478	0.0156511
GO:0051020	GTPase binding	Molecule function	8	21	665	316	15478	0.0538157
GO:0042393	histone binding	Molecule function	10	20	665	185	15478	0.000384949
GO:0016746	transferase activity, transferring acyl groups	Molecule function	6	20	665	266	15478	0.0208503
GO:0031267	small GTPase binding	Molecule function	8	20	665	291	15478	0.0462252
GO:0005085	guanyl-nucleotide exchange factor activity	Molecule function	5	20	665	308	15478	0.0718316
GO:0008017	microtubule binding	Molecule function	5	19	665	219	15478	0.00638482
GO:0016747	transferase activity, transferring acyl groups other than amino-acyl groups	Molecule function	9	19	665	228	15478	0.00951932
GO:0017016	Ras GTPase binding	Molecule function	8	19	665	269	15478	0.041846
GO:0061630	ubiquitin protein ligase activity	Molecule function	6	18	665	198	15478	0.00515928
GO:0061659	ubiquitin-like protein ligase activity	Molecule function	6	18	665	203	15478	0.00659394
GO:0016407	acetyltransferase activity	Molecule function	5	17	665	111	15478	2.00884e-05
GO:0019783	ubiquitin-like protein-specific protease activity	Molecule function	13	17	665	131	15478	0.000154027
GO:0008080	N-acetyltransferase activity	Molecule function	9	16	665	96	15478	1.35544e-05
GO:0016410	N-acyltransferase activity	Molecule function	10	16	665	114	15478	0.000105809
GO:0051427	hormone receptor binding	Molecule function	7	16	665	150	15478	0.00199532
GO:0004518	nuclease activity	Molecule function	7	16	665	228	15478	0.0666882
GO:0043566	structure-specific DNA binding	Molecule function	8	15	665	143	15478	0.00337307
GO:0034212	peptide N-acetyltransferase activity	Molecule function	8	14	665	71	15478	8.66063e-06
GO:0036459	thiol-dependent ubiquitinyl hydrolase activity	Molecule function	9	14	665	120	15478	0.00191208
GO:0101005	ubiquitinyl hydrolase activity	Molecule function	10	14	665	120	15478	0.00191208
GO:0003774	motor activity	Molecule function	5	14	665	138	15478	0.00640541
GO:0004402	histone acetyltransferase activity	Molecule function	10	13	665	61	15478	8.88115e-06
GO:0061733	peptide-lysine-N-acetyltransferase activity	Molecule function	8	13	665	62	15478	1.05886e-05
GO:0004843	thiol-dependent ubiquitin-specific protease activity	Molecule function	6	13	665	80	15478	0.000145925
GO:0070035	purine NTP-dependent helicase activity	Molecule function	7	13	665	105	15478	0.00178703
GO:0008026	ATP-dependent helicase activity	Molecule function	7	13	665	105	15478	0.00178703
GO:0035257	nuclear hormone receptor binding	Molecule function	7	13	665	129	15478	0.00949062
GO:0003777	microtubule motor activity	Molecule function	11	12	665	80	15478	0.000589624
GO:0043021	ribonucleoprotein complex binding	Molecule function	8	12	665	112	15478	0.00863031
GO:0001076	transcription factor activity, RNA polymerase II transcription factor binding	Molecule function	8	12	665	145	15478	0.0476887
GO:0001046	core promoter sequence-specific DNA binding	Molecule function	9	11	665	106	15478	0.0155808
GO:0008094	DNA-dependent ATPase activity	Molecule function	7	10	665	81	15478	0.00774197
GO:0003697	single-stranded DNA binding	Molecule function	13	10	665	102	15478	0.0310221
GO:0031490	chromatin DNA binding	Molecule function	8	10	665	103	15478	0.032755
GO:0003730	mRNA 3'-UTR binding	Molecule function	8	9	665	52	15478	0.00155623
GO:0008565	protein transporter activity	Molecule function	7	9	665	100	15478	0.0653568
GO:0001085	RNA polymerase II transcription factor binding	Molecule function	6	9	665	104	15478	0.0782773
GO:0030374	ligand-dependent nuclear receptor transcription coactivator activity	Molecule function	9	8	665	53	15478	0.00718157
GO:0004004	ATP-dependent RNA helicase activity	Molecule function	5	8	665	66	15478	0.0225733
GO:0002039	p53 binding	Molecule function	10	8	665	67	15478	0.0243086
GO:0008186	RNA-dependent ATPase activity	Molecule function	6	8	665	67	15478	0.0243086
GO:0003724	RNA helicase activity	Molecule function	9	8	665	68	15478	0.0261333
GO:0004197	cysteine-type endopeptidase activity	Molecule function	4	8	665	87	15478	0.0796273
GO:0003678	DNA helicase activity	Molecule function	7	7	665	56	15478	0.0321457
GO:0000979	RNA polymerase II core promoter sequence-specific DNA binding	Molecule function	9	7	665	57	15478	0.034676
GO:0070491	repressing transcription factor binding	Molecule function	11	7	665	60	15478	0.0430226
GO:0003684	damaged DNA binding	Molecule function	8	7	665	63	15478	0.0525296
GO:1990247	N6-methyladenosine-containing RNA binding	Molecule function	12	6	665	7	15478	2.79794e-06
GO:0017025	TBP-class protein binding	Molecule function	7	6	665	21	15478	0.00164214
GO:0042974	retinoic acid receptor binding	Molecule function	9	6	665	24	15478	0.00308376
GO:0018024	histone-lysine N-methyltransferase activity	Molecule function	6	6	665	45	15478	0.0425551
GO:0035064	methylated histone binding	Molecule function	8	6	665	55	15478	0.0860731
GO:0004520	endodeoxyribonuclease activity	Molecule function	8	6	665	55	15478	0.0860731
GO:0005070	SH3/SH2 adaptor activity	Molecule function	9	6	665	56	15478	0.0913601
GO:0016279	protein-lysine N-methyltransferase activity	Molecule function	7	6	665	57	15478	0.0968105
GO:0008574	ATP-dependent microtubule motor activity, plus-end-directed	Molecule function	7	5	665	17	15478	0.00510935
GO:1990939	ATP-dependent microtubule motor activity	Molecule function	6	5	665	18	15478	0.00634935
GO:0035250	UDP-galactosyltransferase activity	Molecule function	7	5	665	29	15478	0.0340196
GO:0008536	Ran GTPase binding	Molecule function	8	5	665	30	15478	0.0379662
GO:0008378	galactosyltransferase activity	Molecule function	9	5	665	34	15478	0.0562609
GO:0004003	ATP-dependent DNA helicase activity	Molecule function	11	5	665	38	15478	0.078494
GO:0005484	SNAP receptor activity	Molecule function	8	5	665	39	15478	0.0846442
GO:0042800	histone methyltransferase activity (H3-K4 specific)	Molecule function	5	4	665	18	15478	0.0396661
GO:0070577	lysine-acetylated histone binding	Molecule function	4	4	665	18	15478	0.0396661
GO:0008301	DNA binding, bending	Molecule function	10	4	665	19	15478	0.0456459
GO:0005545	1-phosphatidylinositol binding	Molecule function	6	4	665	20	15478	0.0520435
GO:0070717	poly-purine tract binding	Molecule function	10	4	665	20	15478	0.0520435
GO:0016922	ligand-dependent nuclear receptor binding	Molecule function	15	4	665	21	15478	0.0588479
GO:0030742	GTP-dependent protein binding	Molecule function	9	4	665	24	15478	0.0815744
GO:0005086	ARF guanyl-nucleotide exchange factor activity	Molecule function	10	4	665	25	15478	0.0898733
GO:0001205	transcriptional activator activity, RNA polymerase II distal enhancer sequence-specific binding	Molecule function	5	4	665	25	15478	0.0898733
GO:0001132	RNA polymerase II transcription factor activity, TBP-class protein binding	Molecule function	4	3	665	3	15478	0.00535595
GO:0001129	RNA polymerase II transcription factor activity, TBP-class protein binding, involved in preinitiation complex assembly	Molecule function	14	3	665	3	15478	0.00535595
GO:0001083	transcription factor activity, RNA polymerase II basal transcription factor binding	Molecule function	9	3	665	4	15478	0.0104075
GO:0051575	5'-deoxyribose-5-phosphate lyase activity	Molecule function	8	3	665	5	15478	0.0168548
GO:0046975	histone methyltransferase activity (H3-K36 specific)	Molecule function	8	3	665	6	15478	0.0245691
GO:0000405	bubble DNA binding	Molecule function	7	3	665	7	15478	0.0334302
GO:0097157	pre-mRNA intronic binding	Molecule function	10	3	665	8	15478	0.0433258
GO:0016929	SUMO-specific protease activity	Molecule function	6	3	665	8	15478	0.0433258
GO:0003680	AT DNA binding	Molecule function	NA	3	665	8	15478	0.0433258
GO:0048027	mRNA 5'-UTR binding	Molecule function	11	3	665	9	15478	0.0541511
GO:0001075	transcription factor activity, RNA polymerase II core promoter sequence-specific binding involved in preinitiation complex assembly	Molecule function	7	3	665	9	15478	0.0541511
GO:0042975	peroxisome proliferator activated receptor binding	Molecule function	6	3	665	10	15478	0.0658083
GO:0051010	microtubule plus-end binding	Molecule function	8	3	665	11	15478	0.0782065
GO:0070182	DNA polymerase binding	Molecule function	6	3	665	11	15478	0.0782065
GO:0043142	single-stranded DNA-dependent ATPase activity	Molecule function	11	3	665	12	15478	0.0912607
GO:0016422	mRNA (2'-O-methyladenosine-N6-)-methyltransferase activity	Molecule function	6	2	665	2	15478	0.0839615
GO:0016979	lipoate-protein ligase activity	Molecule function	4	2	665	2	15478	0.0839615

## Sheet: KEGG
pathway_id	pathway_name	S.gene.number	TS.gene.number	B.gene.number	TB.gene.number	pvalue
hsa04110	Cell cycle	21	293	124	6879	2.07369e-07
hsa05203	Viral carcinogenesis	23	293	205	6879	5.14036e-05
hsa05211	Renal cell carcinoma	12	293	66	6879	8.89811e-05
hsa03040	Spliceosome	16	293	133	6879	0.00047908
hsa03022	Basal transcription factors	9	293	45	6879	0.000523523
hsa03013	RNA transport	18	293	172	6879	0.000955232
hsa03460	Fanconi anemia pathway	9	293	53	6879	0.0016038
hsa03015	mRNA surveillance pathway	11	293	91	6879	0.00498074
hsa05212	Pancreatic cancer	9	293	65	6879	0.00588732
hsa04664	Fc epsilon RI signaling pathway	9	293	68	6879	0.00772934
hsa05220	Chronic myeloid leukemia	9	293	72	6879	0.0108212
hsa05166	HTLV-I infection	20	293	254	6879	0.0113269
hsa04120	Ubiquitin mediated proteolysis	13	293	137	6879	0.0132596
hsa05169	Epstein-Barr virus infection	12	293	122	6879	0.014218
hsa04550	Signaling pathways regulating pluripotency of stem cells	13	293	140	6879	0.0155412
hsa05230	Central carbon metabolism in cancer	8	293	64	6879	0.0180946
hsa04662	B cell receptor signaling pathway	8	293	69	6879	0.0263003
hsa05200	Pathways in cancer	26	293	393	6879	0.0270153
hsa04510	Focal adhesion	16	293	206	6879	0.0285414
hsa05223	Non-small cell lung cancer	7	293	56	6879	0.0304136
hsa03008	Ribosome biogenesis in eukaryotes	9	293	87	6879	0.0307241
hsa04914	Progesterone-mediated oocyte maturation	9	293	87	6879	0.0307241
hsa05168	Herpes simplex infection	14	293	183	6879	0.0470596
hsa05202	Transcriptional misregulation in cancer	13	293	167	6879	0.051263
hsa05131	Shigellosis	7	293	64	6879	0.0532013
hsa05214	Glioma	7	293	65	6879	0.0566216
hsa04068	FoxO signaling pathway	11	293	134	6879	0.0581142
hsa05120	Epithelial cell signaling in Helicobacter pylori infection	7	293	67	6879	0.0638511
hsa05213	Endometrial cancer	6	293	52	6879	0.0683011
hsa05222	Small cell lung cancer	8	293	85	6879	0.0684106
hsa04010	MAPK signaling pathway	17	293	253	6879	0.071641
hsa05215	Prostate cancer	8	293	88	6879	0.0792218
hsa04520	Adherens junction	7	293	71	6879	0.0798653
hsa04917	Prolactin signaling pathway	7	293	71	6879	0.0798653
hsa04360	Axon guidance	10	293	127	6879	0.0900802
hsa04014	Ras signaling pathway	15	293	226	6879	0.0992942
